# Supplementary material
Source: PubMed Central journal article supplement (PMC7959165)
Supplement: NIHMS1676124-supplement-Supplemental_file.pdf [file NIHMS1676124-supplement-Supplemental_file.pdf]

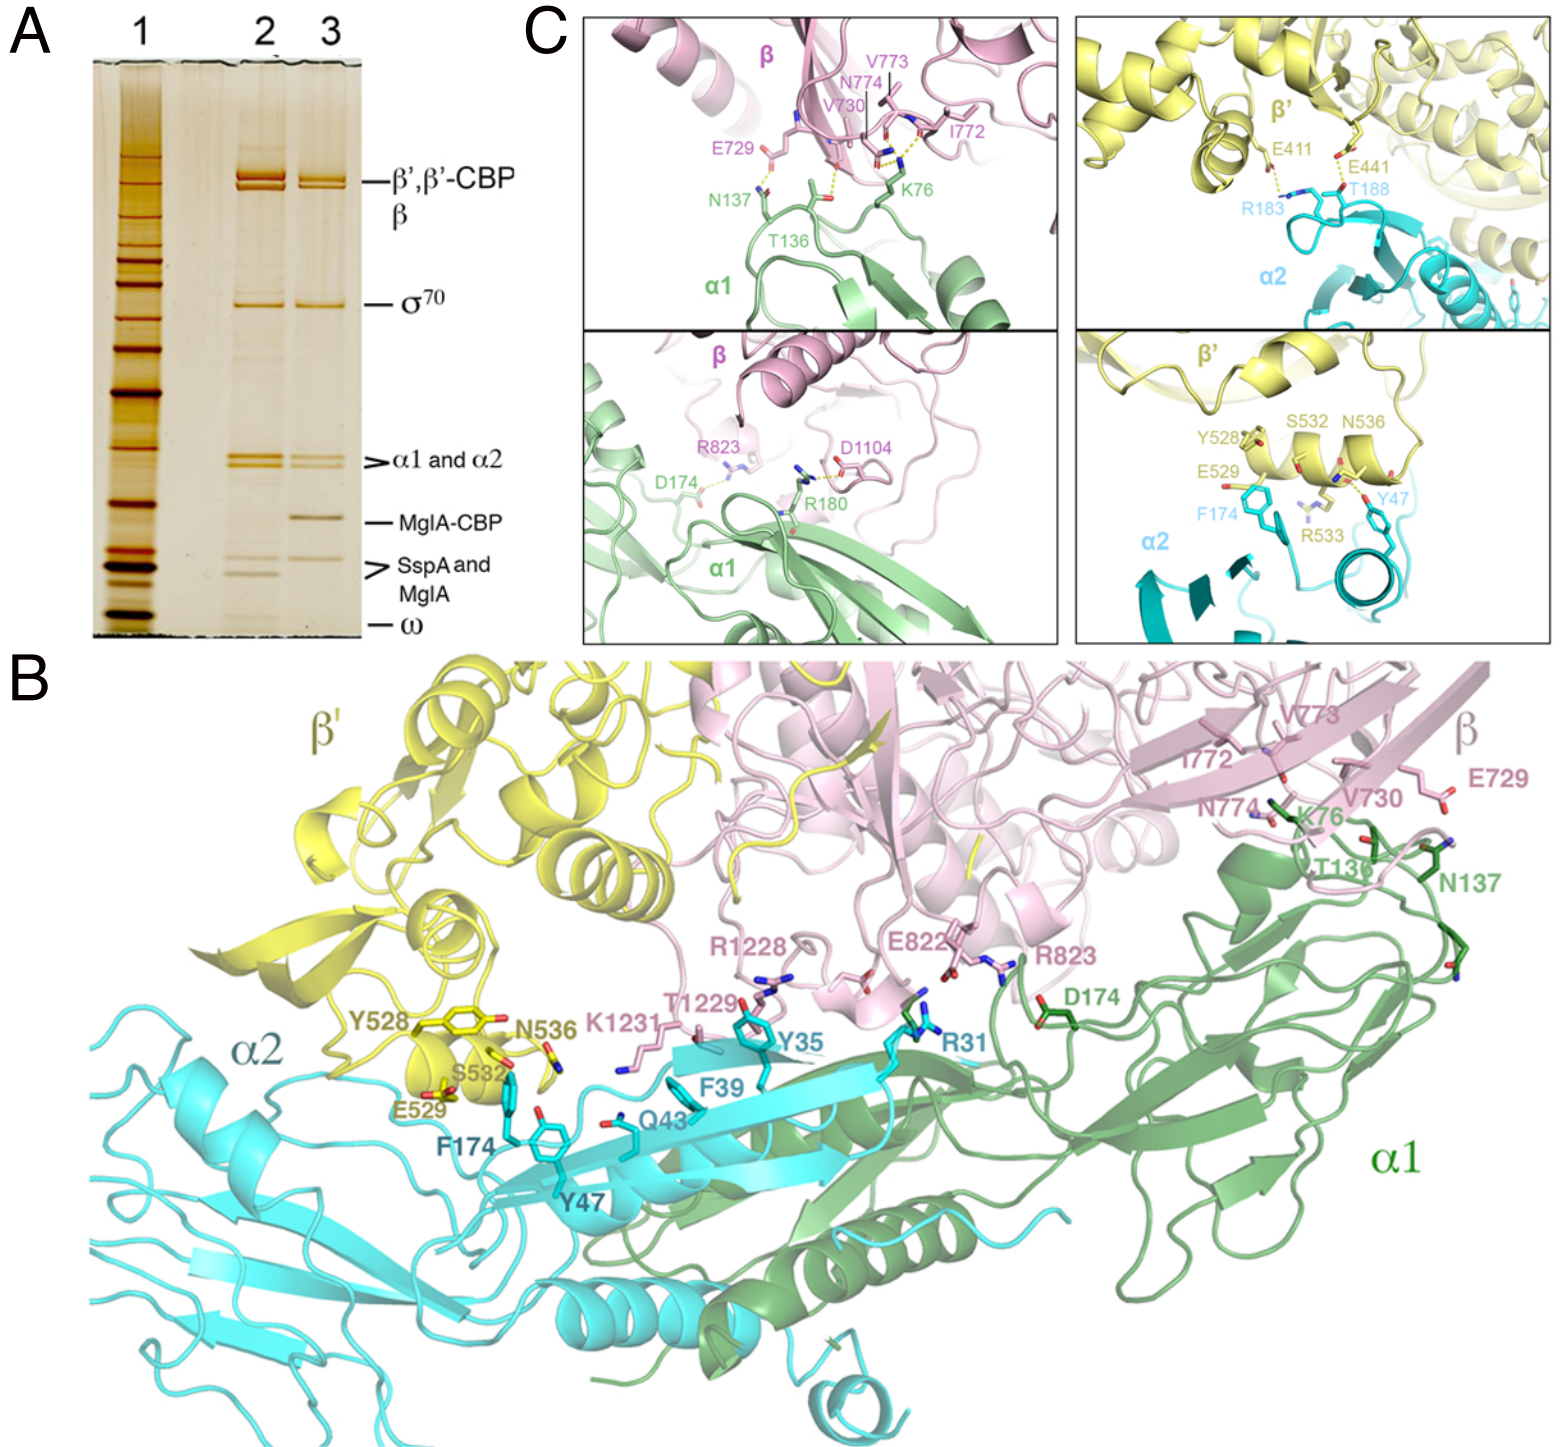

**Figure S1. Purification of *FtRNAP* $\sigma^{70}$ -(MglA-SspA) complex and analyses of distinct  $\alpha$  subunit contacts, related to Figure 1**

**A** SDS silver stain gel showing *FtRNAP* $\sigma^{70}$ -(MglA-SspA) complex purifications. Lane 1 is the molecular weight standard. Lane 2 is purification of complex in which  $\beta'$ -TAP was used to pulldown the *FtRNAP* $\sigma^{70}$ -(MglA-SspA) complex. Lane 3 shows a similar purification in which an MglA-CBP tagged protein was used to pulldown the *FtRNAP* $\sigma^{70}$ -(MglA-SspA) complex. **B** Ribbon diagram showing specific  $\alpha 1$ - $\alpha 2$  contacts with  $\beta$  and  $\beta'$ . **C** Close up showing contacts that are specific for  $\alpha 1$  interactions with  $\beta$  and  $\alpha 2$  interactions with  $\beta'$ .  $\alpha 1$ ,  $\alpha 2$ ,  $\beta$  and  $\beta'$  are colored as in Figure 1A.

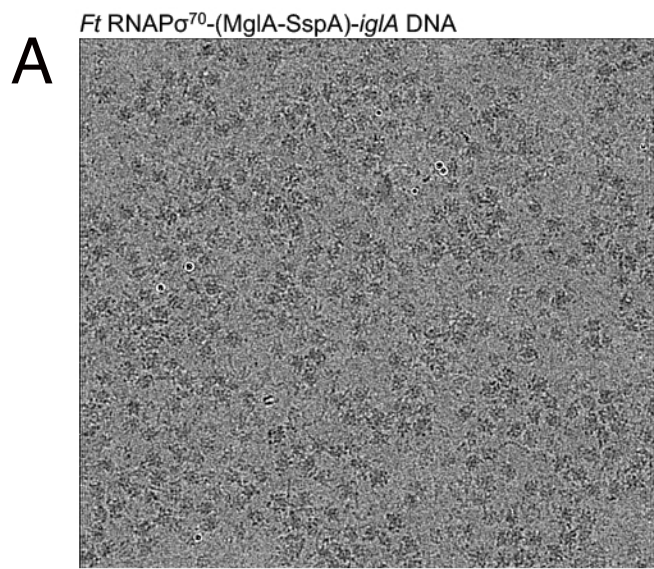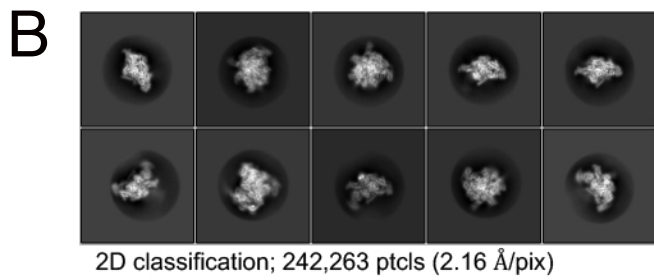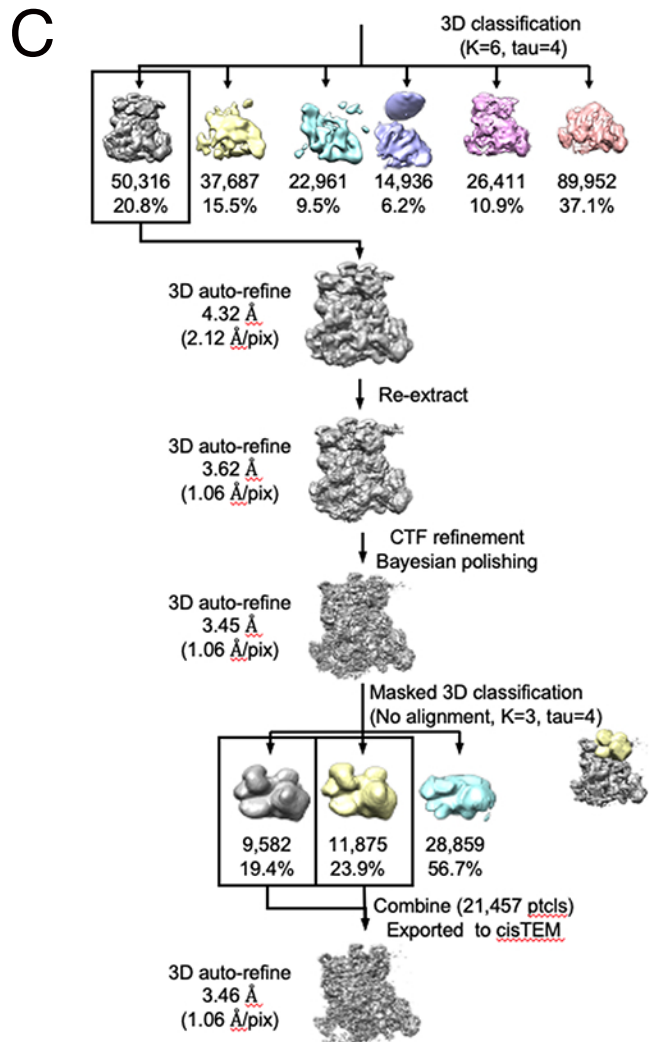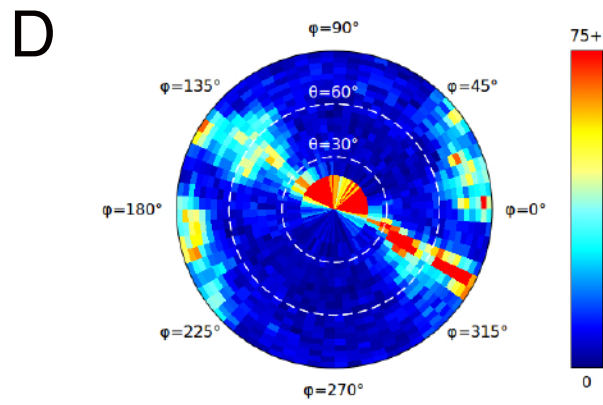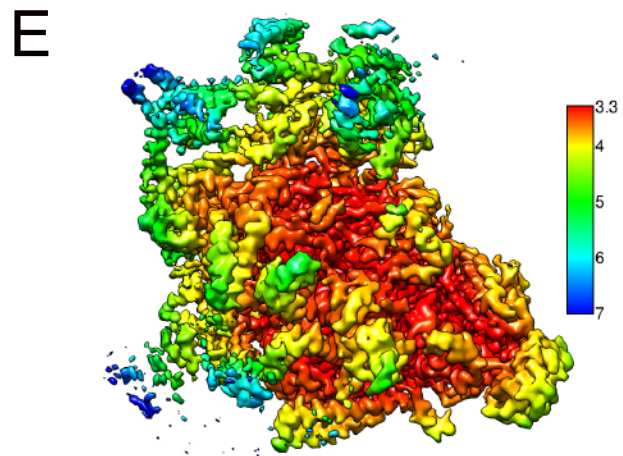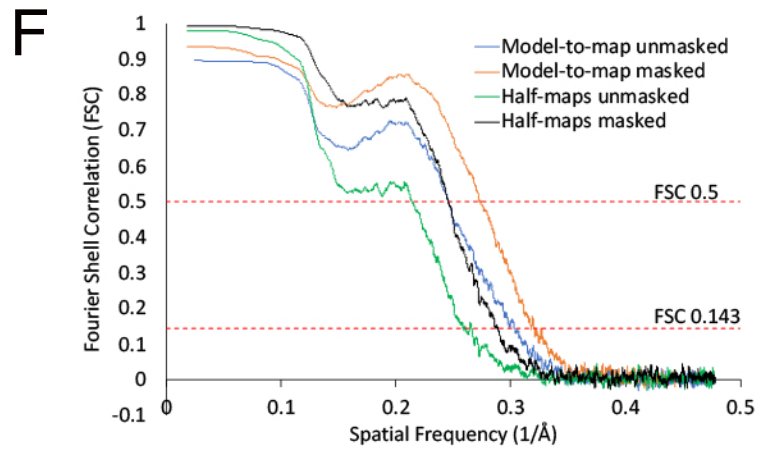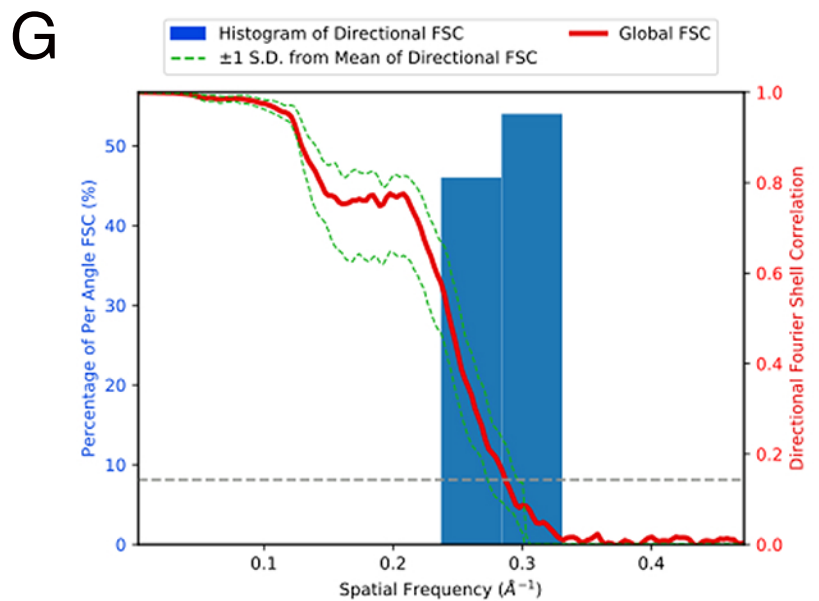

**Figure S2. Cryo-EM data processing workflow of the *FtRNAP* $\sigma^{70}$ -(MglA-SspA)-DNA dataset, related to Figure 1**

**A** A representative micrograph from a *FtRNAP* $\sigma^{70}$ -(MglA-SspA)-DNA complex grid. **B** A subset of the 2D classes showing clear structural features. **C** Flow chart of the data processing strategy. **D** Angular distribution plot of the final particle set. **E** Final map colored by local resolution. **F** Masked and unmasked half-map FSC curves were used to determine global resolution of 3.46 Å. **G** Directional 3D FSC plot calculated using 3DFSC.



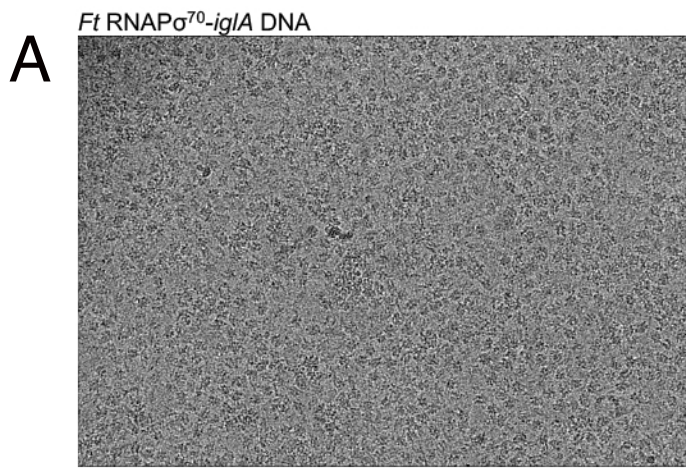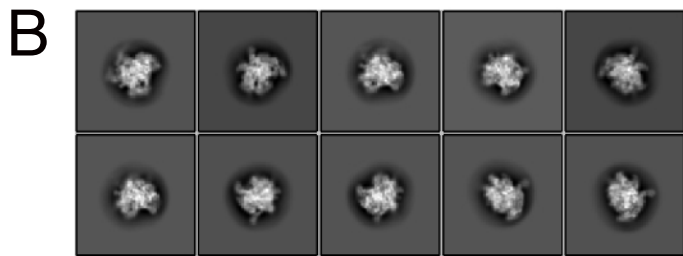

2D classification; 745,802 ptcls (4.32 Å/pix)

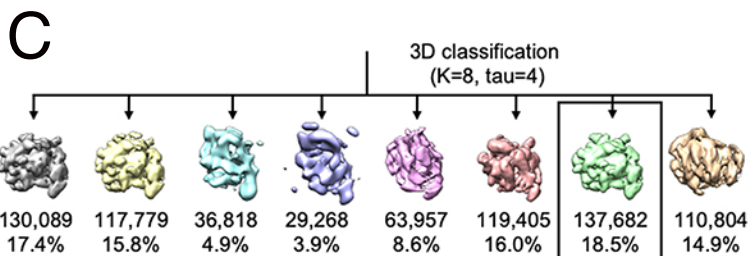

3D auto-refine  
8.56 Å  
(4.28 Å/pix)

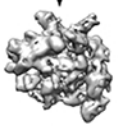

Re-extract

3D auto-refine  
3.25 Å  
(1.07 Å/pix)

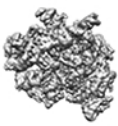

CTF refinement (2 rds)  
Bayesian polishing (2 rds)

3D auto-refine  
2.98 Å  
(1.07 Å/pix)

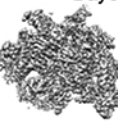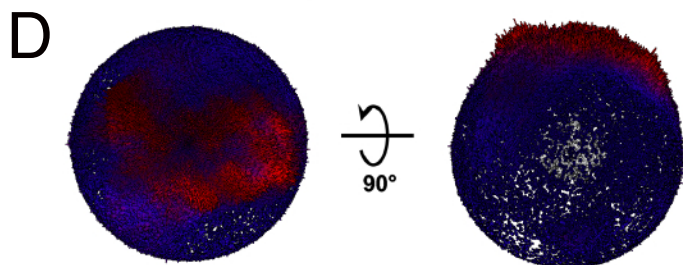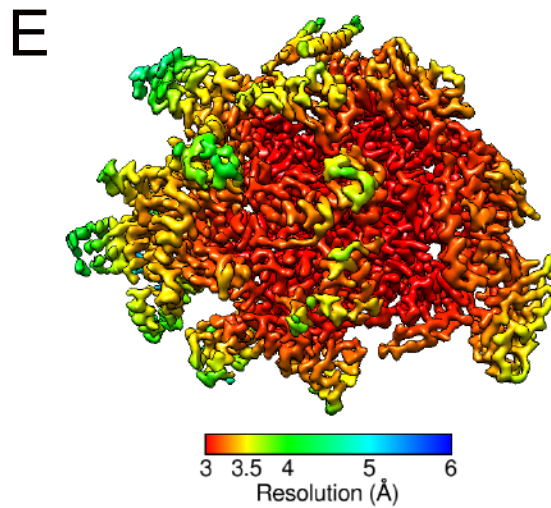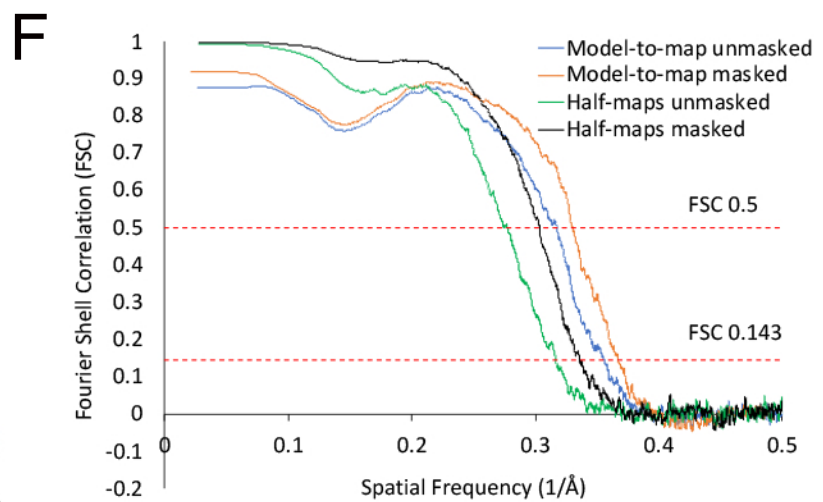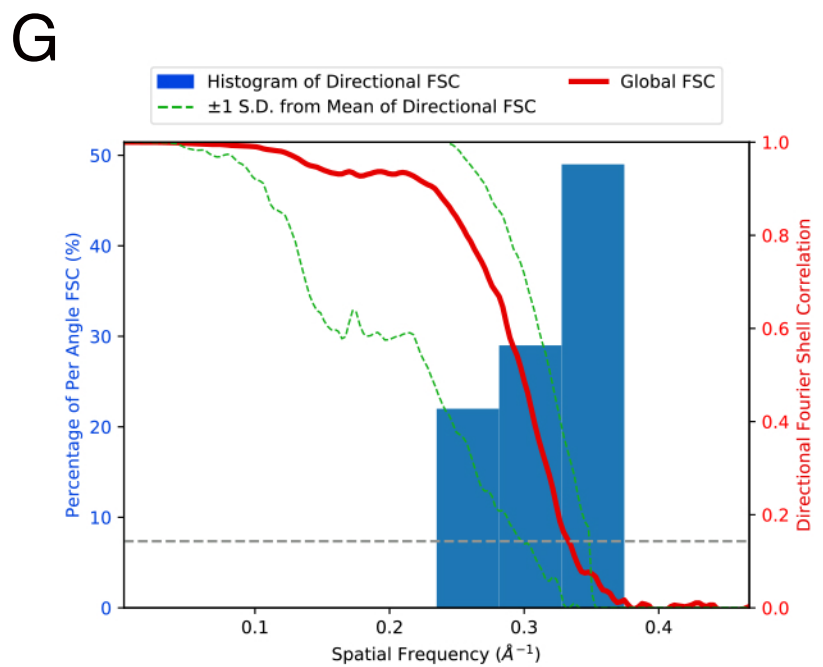

**Figure S3. Cryo-EM data processing workflow of the *FtRNAP* $\sigma^{70}$ -DNA dataset, related to Figure 1**

**A** A representative micrograph from the *FtRNAP* $\sigma^{70}$ -DNA dataset. **B** A subset of the 2D classes showing clear structural features. **C** Flow chart of the data processing strategy. **D** Angular distribution map of the final particle set used in the reconstruction. Each orientation is represented by a colored cylinder, ranging from blue to red, with a height proportional to the number of particles in that orientation. **E** Final map colored by local resolution. **F** Masked and unmasked half-map and model FSC curves used to determine global resolution. **G** Directional 3D FSC plot calculated using 3DFSC.

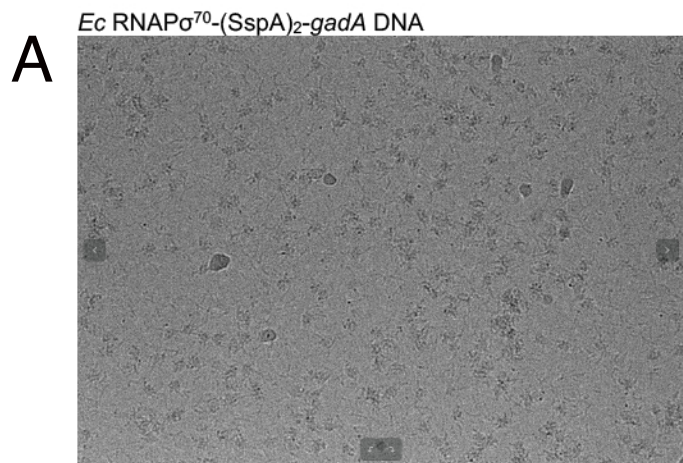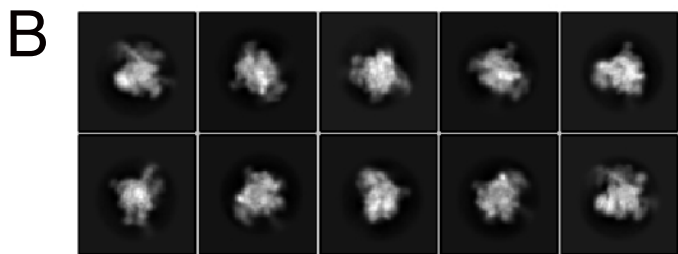

2D classification; 393,711 ptcls (4.4 Å/pix)

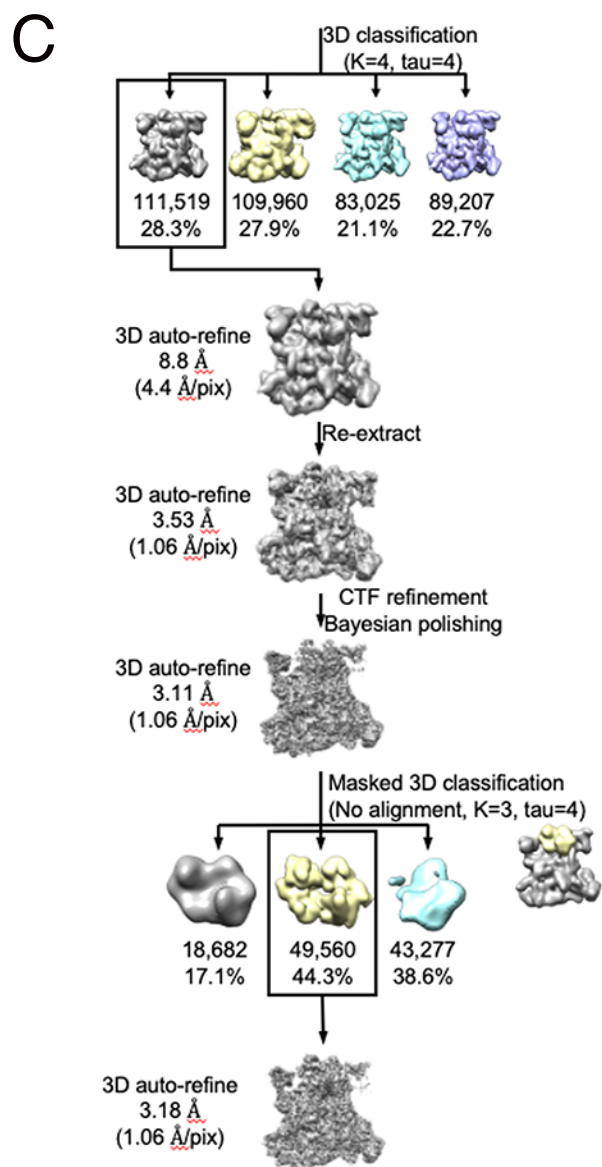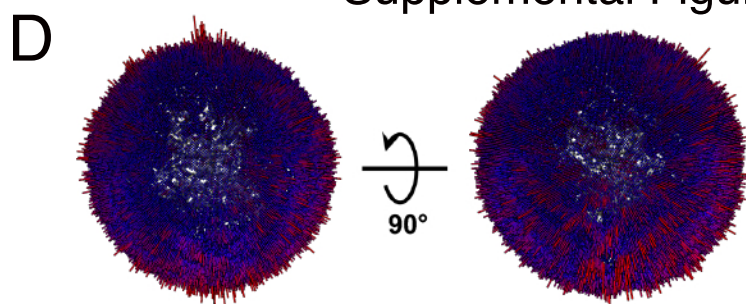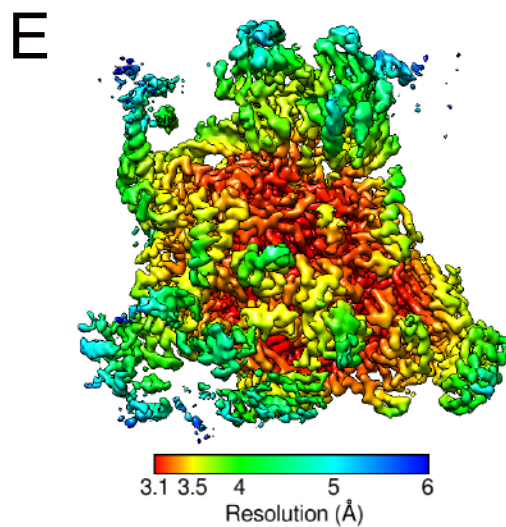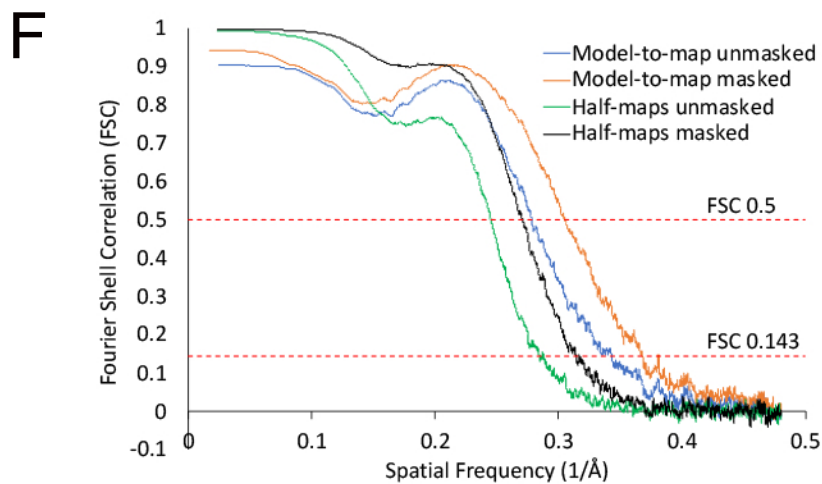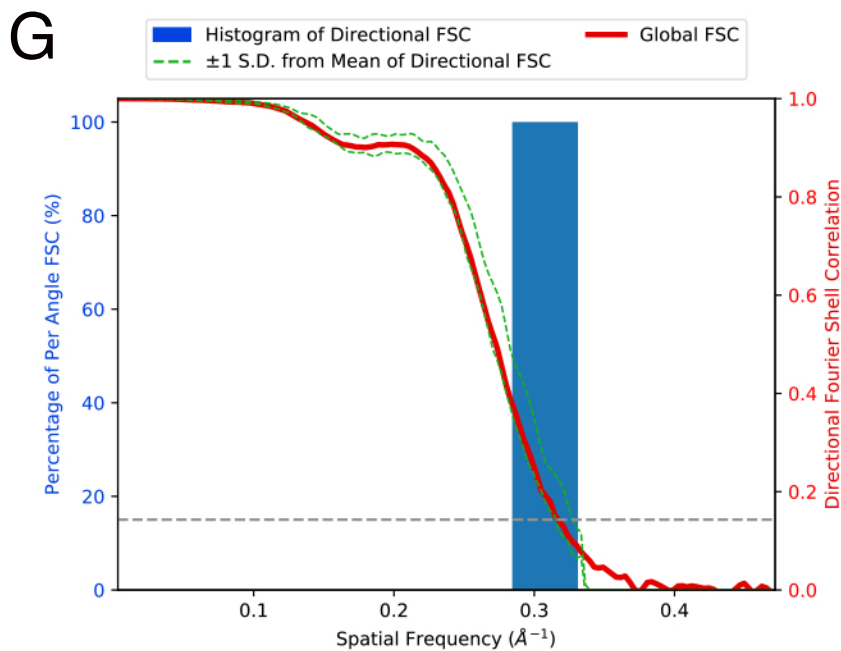

**Figure S4. Cryo-EM data processing workflow of the *Ec*RNAP $\sigma^{70}$ -(SspA)<sub>2</sub>-DNA dataset, related to Figure 2**

**A** A representative micrograph of the *Ec*RNAP $\sigma^{70}$ -(SspA)<sub>2</sub>-DNA complex. **B** A subset of the 2D classes showing clear structural features. **C** Flow chart of the data processing strategy. **D** Angular distribution map of the final particle set used in the reconstruction. **E** Final map colored by local resolution. **F** Masked and unmasked half-map FSC curves were used to determine the global resolution of 3.20 Å. **G** Directional 3D FSC plot calculated using 3DFSC.



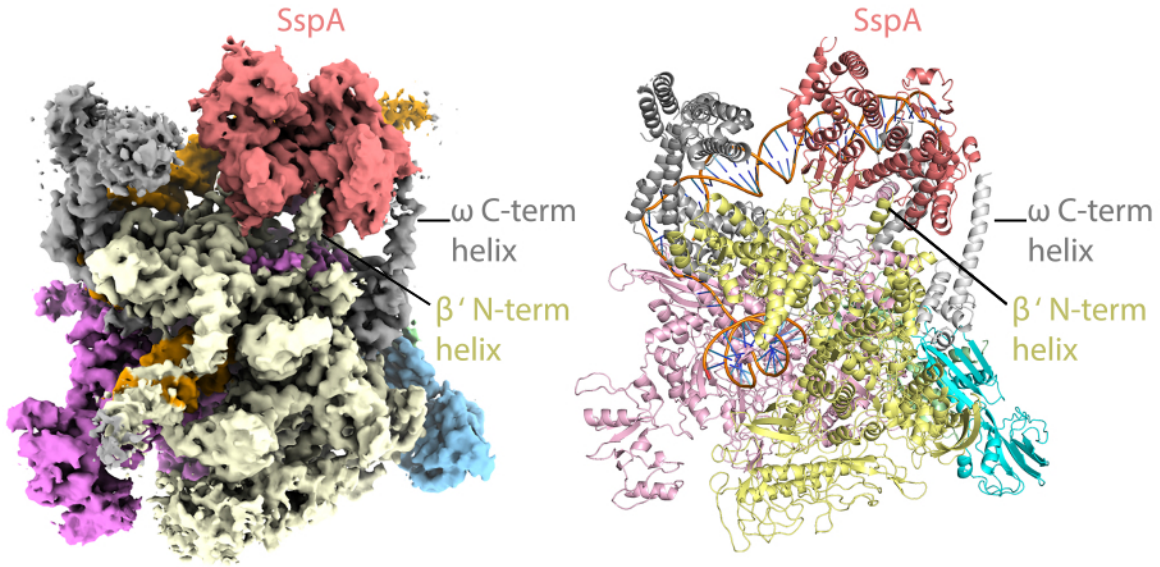

**Figure S5. Additional interactions between *Ec*SspA and the *Ec*RNAP  $\beta'$  and  $\omega$  subunits, related to Figure 2**

Final *Ec*RNAP $\sigma^{70}$ -(SspA)<sub>2</sub>-DNA map (left) and model (right) colored by subunit. The N-terminal helix of  $\beta'$  contacts both SspA monomers and the C-terminal helix of  $\omega$  contacts one SspA monomer.

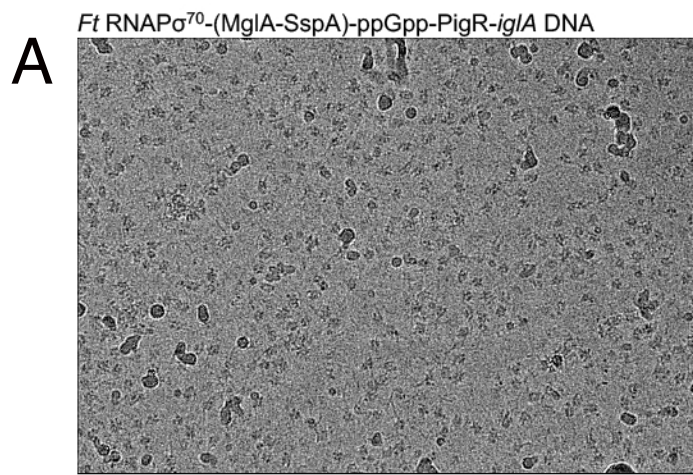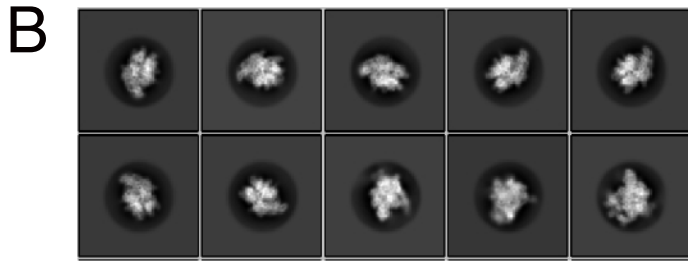

2D classification; 1,901,718 ptcls (4.28 Å/pix)

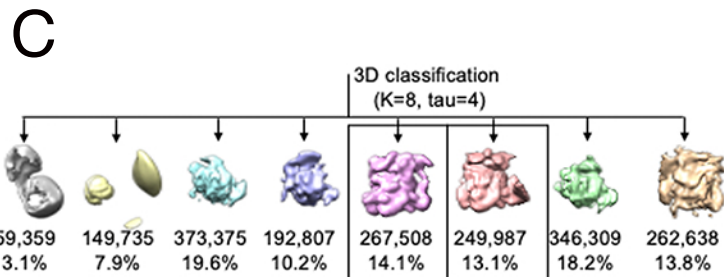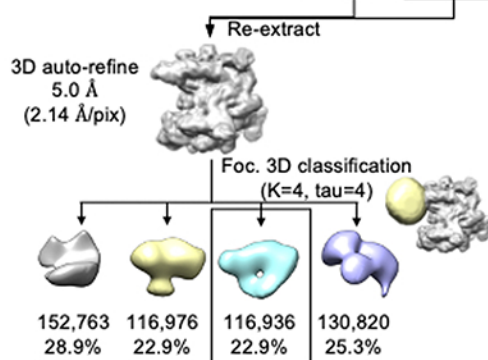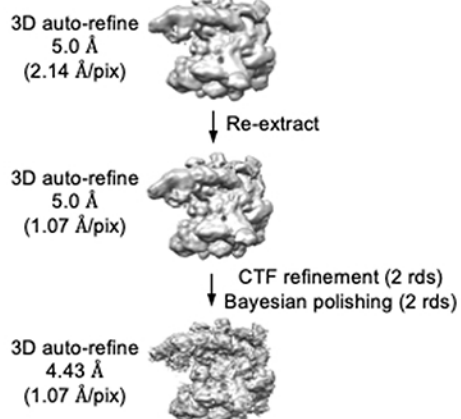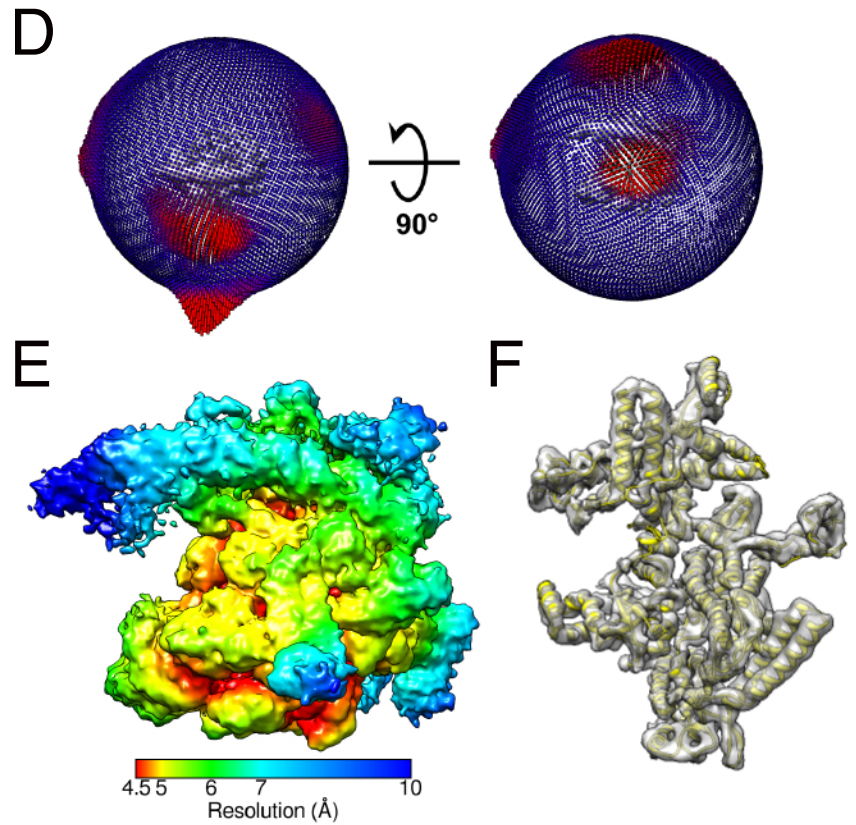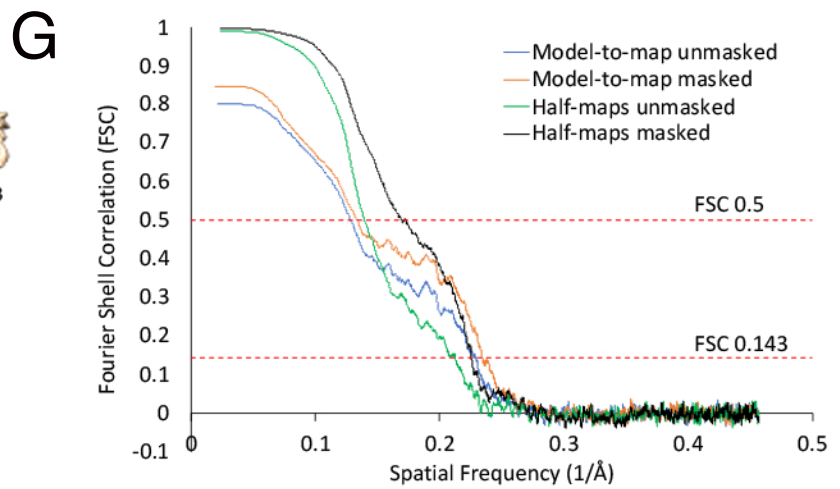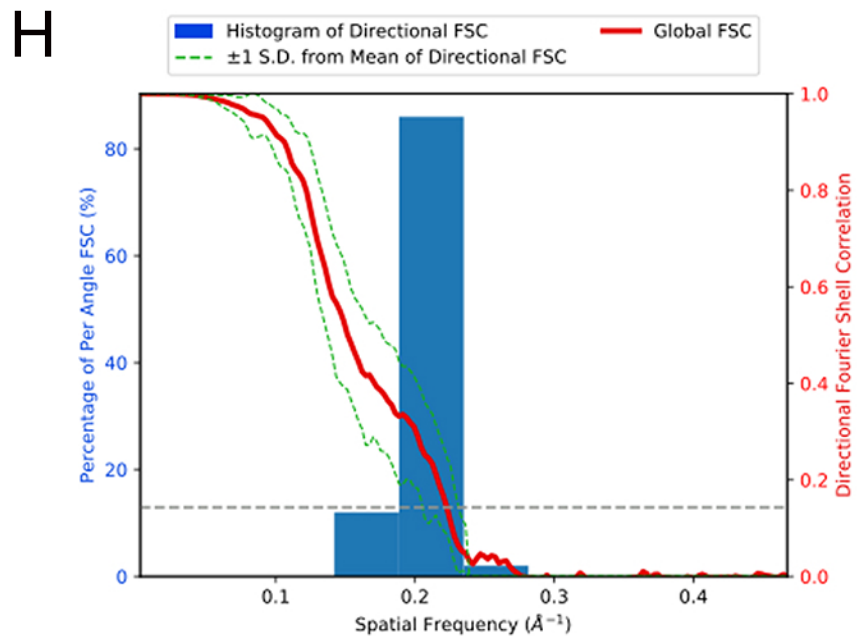

**Figure S6. Cryo-EM data processing workflow of the *Ft*RNAP $\sigma^{70}$ -(MglA-SspA)-ppGpp-PigR-DNA dataset, related to Figure 4**

**A** A representative micrograph of the *Ft*RNAP $\sigma^{70}$ -(MglA-SspA)-ppGpp-PigR-DNA complex. **B** A subset of the 2D classes showing clear structural features. **C** Flow chart of the data processing strategy. **D** Angular distribution maps of the final particle set used in the reconstruction. **E** Final map colored by local resolution. **F** Map-model overlay for the  $\beta'$  core subunit included to show map quality. **G** Masked and unmasked half-map FSC curves were used to determine the global resolution. **H** Directional 3D FSC plot calculated using 3DFSC.



**A** PigR-independent promoters activated by MglA-SspA

| Promoter         |              | -35           |                   | -10                   | TSS      |
|------------------|--------------|---------------|-------------------|-----------------------|----------|
| <i>FTL_1174*</i> | AGTTAAATAAGT | <b>TTCTTA</b> | TAGCATACATTTTGTTA | AAATATTCT             | <b>A</b> |
| <i>FTL_0488*</i> | TTTATTTTGAAC | <b>TTCATA</b> | TTCAGTGACACAATCTC | TATAATTCAAT           | <b>A</b> |
| <i>FTL_1345*</i> | AAGCTTTTAATA | <b>AATACA</b> | AAACGGCAATAATTTG  | TATTATACTCTTTCCTA     | <b>A</b> |
| <i>FTL_1511*</i> | TAATATAAAACT | <b>TTGCTA</b> | TTTGATACCAAAAGAG  | TAATTAATATTTGT        | <b>G</b> |
| <i>FTL_1012*</i> | CAAAGCTATTTT | <b>TTTTTA</b> | TAAACTTCTTTGTTAC  | TATATACCT.            | <b>A</b> |
| <i>FTL_0361*</i> | TAAGGCTTGAAA | <b>ATTTTA</b> | GTATTTAACGTCATC   | <b>TTTATACAC.</b>     | <b>A</b> |
| <i>FTL_1046*</i> | TATAACTTACTG | <b>TATTTA</b> | TAAGAGATAAAAATGC  | <b>TATTAT</b> CTCGGTT | <b>A</b> |
| Consensus        |              | <b>TTGACA</b> |                   | <b>TATAAT</b>         |          |

\*TSS estimated using RNA-Seq data

**B** PigR-dependent promoters

| Promoter         |                     | UP                       | PRE  | UP            |                    | -35            |         | -10      | TSS |
|------------------|---------------------|--------------------------|------|---------------|--------------------|----------------|---------|----------|-----|
| <i>iglA</i>      | AATGATCTGGGTTTAAAT  | TT <b>AGCTGT</b> AATAAA  | CA   | <b>TTGTGT</b> | TATTGGCGTTATTAAGG  | <b>TA</b> ACTT | GCTTAT  | <b>A</b> |     |
| <i>FTL_0026</i>  | AATACTATAAAAATAGTA  | TT <b>TGCAGT</b> AAAAA   | AG   | <b>TGTTAA</b> | TCAGTTTTGTGAGGTAC  | <b>TAAAA</b> T | TAAATAT | <b>A</b> |     |
| <i>pigR*</i>     | ATCTACTAAACTGAAATA  | AT <b>TGCTGT</b> AGAAA   | AGG  | <b>TTGTTG</b> | CAAATGATAAAAAAATG  | <b>TAAGAT</b>  | GAATAGT | <b>T</b> |     |
| <i>FTL_1219</i>  | TAAATAAAATAAAAATAT  | TT <b>TGCTATA</b> AAAT   | TTAT | <b>TTCAAA</b> | ATGAAATTGATTAATGCA | <b>TACTTA</b>  | CTGATA  | <b>A</b> |     |
| <i>FTL_0170*</i> | CCTTTAAGGTATATAATC  | CAC <b>GCTGT</b> AACAT   | AGAG | <b>TATTCT</b> | TTTTAAAAATTTGTGTT  | <b>TATAGT</b>  | ATAGC   | <b>A</b> |     |
| <i>FTL_0221*</i> | ATTTTTATCATTTTTAA   | TT <b>TGCTGT</b> AGTAA   | ATTA | <b>TCGAGC</b> | AGAGTATTTTTTGT     | <b>TAGACT</b>  | GTAAAA  | <b>A</b> |     |
| <i>pdpA</i>      | ACTTTATCGTCAGACCAA  | TT <b>AGCTGT</b> AACA    | TA   | <b>TAGTCA</b> | ATAGATAAGTGCTTATG  | <b>TAAAA</b> T | GACTTT  | <b>A</b> |     |
| <i>FTL_0207*</i> | GAGCTAAATGCTGCAATA  | TAT <b>GCTGT</b> A AAAAG | ATT  | <b>TTAATA</b> | ATTATCATGAGCTGC    | <b>TAAAT</b> T | TAATT   | <b>A</b> |     |
| <i>FTL_0816*</i> | AATATGCAATAATTA AAA | TAT <b>TGCCGT</b> AGAAA  | AG   | <b>TTTATA</b> | GGGTTGTTTGTA ACTGT | <b>TACGAT</b>  | GAAAAC  | <b>A</b> |     |
| <i>FTL_0067*</i> | CTAAGGCTCTAATAAAGA  | CT <b>TGCTATA</b> AAGA   | TGA  | <b>TTTAGT</b> | TTAGAGACCTGGTATG   | <b>TAAAA</b> T | TGAGAT  | <b>A</b> |     |
| <i>FTL_1832*</i> | TCTCTAGACCCTTATTTT  | TT <b>TGCAATA</b> AAAA   | A    | <b>TTGTAT</b> | TTTATACTTAAATAAAC  | <b>GATAAT</b>  | GATATTC | <b>G</b> |     |
| <i>FTL_1218</i>  | ATATTTGTAATTAAGAT   | GAT <b>TGCCATA</b> AAAT  | CTA  | <b>TAAACA</b> | GCTAAAAATCAAAAAGG  | <b>TATAAT</b>  | TGTTGT  | <b>A</b> |     |

\*TSS estimated using RNA-Seq data

**C** MEME motif derived from PRE containing/PigR-dependent promoters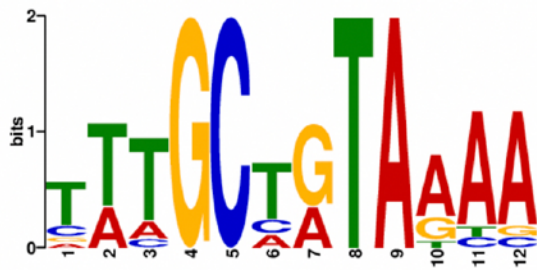

**Figure S7. PigR-independent and PigR-dependent MglA-SspA regulated promoters, related to Figure 7**

**A** Promoters identified from RNA-Seq experiments that are activated by >2.2 fold MglA-SspA in a PigR-independent manner ( $\Delta pigR$ ). The predicted -35 and -10 promoter elements are labeled and underlined. Also labeled and highlighted in yellow are the predicted transcription start site (TSS) of each promoter. Base pairs shown to be involved in direct contacts with residues of the  $\sigma 4$  (-35 element) or  $\sigma 2$  (-10) element (Campbell et al., 2002) are highlighted in yellow. “Consensus” refers to the optimal element motifs from well-studied  $\sigma^{70}$  proteins, *E. coli* and *Taq*. **B** Promoters that MglA-SspA activate in a PigR-dependent manner. The -35, -10 and TSS are labeled and highlighted as in A. Also bolded and underlined are the predicted PRE sites. **C** MEME identified from PigR-dependent promoters sequences. The MEME pattern shows that in addition to the PRE, the bps that surround the PRE are also highly conserved, AT-rich regions. Transcription start sites were either previously identified (Ramsey et al., 2015) or estimated from published RNA-Seq data (Ramsey and Dove, 2016). For MEME analyses, DNA sequences corresponding to the transcription start site and 66 - 71 bp upstream were submitted to MEME (version 5.1.1) for twelve promoters tightly controlled by PigR (with transcripts reduced 26 - 4.4-fold in abundance in the absence of PigR).

Table S1 : Cryo-EM data collection, refinement, and validation statistics

|                                           | <i>Ft RNAP<math>\sigma^{70}</math>-(MglA-SspA)-iglA</i><br>PDB: 6WMR<br>EMD-21851 | <i>Ft RNAP<math>\sigma^{70}</math>-iglA</i><br>PDB: 6WMP<br>EMD-21850 | <i>Ec RNAP<math>\sigma^{70}</math>-(SspA)-gadA</i><br>PDB: 6WMU<br>EMD-21853 | <i>Ft RNAP<math>\sigma^{70}</math>-(MglA-SspA)-ppGpp-PigR-iglA</i><br>PDB: 6WMT<br>EMD-21852 |
|-------------------------------------------|-----------------------------------------------------------------------------------|-----------------------------------------------------------------------|------------------------------------------------------------------------------|----------------------------------------------------------------------------------------------|
| <b>Data collection and Processing</b>     |                                                                                   |                                                                       |                                                                              |                                                                                              |
| Electron microscope                       | Titan Krios (Duke)                                                                | Titan Krios (Duke)                                                    | Titan Krios (PNCC)                                                           | Titan Krios (Duke)                                                                           |
| Detector                                  | Falcon III                                                                        | K3                                                                    | K3                                                                           | K3                                                                                           |
| Magnification                             | 75,000x                                                                           | 22,500x                                                               | 81,000x                                                                      | 22,500x                                                                                      |
| Voltage (keV)                             | 300                                                                               | 300                                                                   | 300                                                                          | 300                                                                                          |
| Electron exposure (e-/Å <sup>2</sup> )    | 42                                                                                | 60                                                                    | 50                                                                           | 60                                                                                           |
| Defocus range (μm)                        | -1.0 to -2.5                                                                      | -1.0 to -2.0                                                          | -1.0 to -3.0                                                                 | -1.25 to -2.75                                                                               |
| Pixel size (Å)                            | 1.06                                                                              | 1.07                                                                  | 0.53                                                                         | 1.07                                                                                         |
| Total extracted particles (no.)           | 618,526                                                                           | 1,503,586                                                             | 672,043                                                                      | 3,485,423                                                                                    |
| Refined particles (no.)                   | 242,263                                                                           | 745,802                                                               | 393,711                                                                      | 1,901,718                                                                                    |
| <b>Reconstruction</b>                     |                                                                                   |                                                                       |                                                                              |                                                                                              |
| Final particles (no.)                     | 21,457                                                                            | 137,682                                                               | 49,560                                                                       | 116,936                                                                                      |
| Symmetry imposed                          | C1                                                                                | C1                                                                    | C1                                                                           | C1                                                                                           |
| FSC 0.143 (unmasked/masked) (Å)           | 3.86/3.46                                                                         | 3.16/2.98                                                             | 3.52/3.18                                                                    | 4.78/4.43                                                                                    |
| Map sharpening B-factor (Å <sup>2</sup> ) | -90                                                                               | -37                                                                   | -47                                                                          | 0                                                                                            |
| <b>Refinement</b>                         |                                                                                   |                                                                       |                                                                              |                                                                                              |
| <b>Model composition</b>                  |                                                                                   |                                                                       |                                                                              |                                                                                              |
| Non-hydrogen atoms                        | 30,441                                                                            | 22,296                                                                | 34,094                                                                       | 31,926                                                                                       |
| Protein residues                          | 3,743                                                                             | 2,879                                                                 | 4,121                                                                        | 3,890                                                                                        |
| Nucleotides                               | 81                                                                                | 47                                                                    | 86                                                                           | 116                                                                                          |
| Ions/Ligands                              | 3                                                                                 | 3                                                                     | 3                                                                            | 5                                                                                            |
| MolProbity score                          | 3.12                                                                              | 2.96                                                                  | 3.17                                                                         | 3.04                                                                                         |
| Clash score                               | 16.43                                                                             | 9.38                                                                  | 20.86                                                                        | 57.80                                                                                        |
| <b>Bonds (RMSD)</b>                       |                                                                                   |                                                                       |                                                                              |                                                                                              |
| Bond lengths (Å)                          | 0.008                                                                             | 0.011                                                                 | 0.016                                                                        | 0.013                                                                                        |
| Bond angles (°)                           | 0.776                                                                             | 0.922                                                                 | 0.999                                                                        | 1.483                                                                                        |
| <b>Ramachandran plot (%)</b>              |                                                                                   |                                                                       |                                                                              |                                                                                              |
| Favored (%)                               | 85.20                                                                             | 86.17                                                                 | 88.02                                                                        | 96.11                                                                                        |
| Allowed (%)                               | 14.67                                                                             | 13.62                                                                 | 11.69                                                                        | 3.32                                                                                         |
| Disallowed (%)                            | 0.13                                                                              | 0.21                                                                  | 0.29                                                                         | 0.57                                                                                         |

Table S2: New MglA regulon revealed by RNA-seq studies, related to Figure 2

| Locus Number | Gene name   | Gene product                                                                                | $\Delta$ mglA pF compared to LVS pF |                   |                  | $\Delta$ pigR pF compared to LVS pF |                   |                  | Previous MglA Regulon* |
|--------------|-------------|---------------------------------------------------------------------------------------------|-------------------------------------|-------------------|------------------|-------------------------------------|-------------------|------------------|------------------------|
|              |             |                                                                                             | Mean of normalized read counts      | log-2 Fold Change | adjusted p-value | Mean of normalized read counts      | log-2 Fold Change | adjusted p-value |                        |
| FTL_0111     | <i>iglA</i> | intracellular growth locus, subunit A                                                       | 3414.2                              | -4.93             | 5.9E-116         | 3414.2                              | -4.75             | 1.3E-108         | yes                    |
| FTL_0026     | -           | 3-hydroxyisobutyrate dehydrogenase                                                          | 576.7                               | -4.46             | 2.8E-63          | 576.7                               | -4.34             | 4.2E-58          | yes                    |
| FTL_0449     | <i>pigR</i> | pathogenicity island gene regulator                                                         | 6782.1                              | -4.10             | 3.7E-48          | 6782.1                              | -7.26             | 2.0E-110         | yes                    |
| FTL_0112     | <i>iglB</i> | intracellular growth locus, subunit B                                                       | 10167.4                             | -3.96             | 2.3E-59          | 10167.4                             | -3.75             | 3.2E-53          | yes                    |
| FTL_1219     | -           | hypothetical protein                                                                        | 5828.6                              | -3.84             | 3.3E-118         | 5828.6                              | -2.77             | 2.6E-62          | yes                    |
| FTL_0170     | -           | hypothetical protein                                                                        | 131.1                               | -3.72             | 4.0E-45          | 131.1                               | -4.40             | 4.2E-44          | no                     |
| FTL_0348     | -           | -                                                                                           | 475.3                               | -3.71             | 5.7E-64          | 475.3                               | -4.45             | 1.0E-73          | yes                    |
| FTL_0221     | -           | amino acid permease                                                                         | 1158.6                              | -3.68             | 1.4E-45          | 1158.6                              | -4.40             | 7.7E-61          | yes                    |
| FTL_0349     | -           | -                                                                                           | 115.3                               | -3.51             | 1.5E-36          | 115.3                               | -3.98             | 9.0E-37          | yes                    |
| FTL_0126     | <i>pdpA</i> | PdpA protein                                                                                | 711.9                               | -3.51             | 8.1E-32          | 711.9                               | -3.92             | 3.8E-38          | yes                    |
| FTL_1213     | -           | hypothetical protein                                                                        | 926.2                               | -3.46             | 6.3E-33          | 926.2                               | -3.48             | 6.5E-33          | yes                    |
| FTL_0121     | <i>iglG</i> | hypothetical protein                                                                        | 871.7                               | -3.39             | 1.9E-49          | 871.7                               | -3.37             | 6.9E-48          | yes                    |
| FTL_0113     | <i>iglC</i> | intracellular growth locus, subunit C                                                       | 14862.4                             | -3.20             | 4.8E-35          | 14862.4                             | -3.18             | 1.2E-34          | yes                    |
| FTL_0207     | -           | pyrrolidone-carboxylate peptidase                                                           | 2022.5                              | -3.15             | 4.4E-63          | 2022.5                              | -2.84             | 3.3E-51          | yes                    |
| FTL_0816     | -           | hypothetical protein                                                                        | 132.6                               | -3.13             | 3.0E-34          | 132.6                               | -3.49             | 2.6E-35          | no                     |
| FTL_0025     | -           | hypothetical protein                                                                        | 29.5                                | -3.11             | 7.9E-17          | 29.5                                | -3.66             | 6.5E-19          | no                     |
| FTL_0120     | <i>iglH</i> | hypothetical protein                                                                        | 413.5                               | -3.03             | 7.2E-24          | 413.5                               | -3.28             | 8.4E-27          | yes                    |
| FTL_0208     | -           | putative cytochrome c-type biogenesis protein                                               | 326.1                               | -2.92             | 5.2E-43          | 326.1                               | -3.16             | 5.1E-46          | yes                    |
| FTL_0114     | <i>iglD</i> | intracellular growth locus, subunit D                                                       | 4658.5                              | -2.83             | 1.0E-24          | 4658.5                              | -3.26             | 4.2E-32          | yes                    |
| FTL_0027     | -           | 3-hydroxyisobutyrate dehydrogenase                                                          | 195.8                               | -2.79             | 1.5E-24          | 195.8                               | -3.33             | 4.5E-30          | yes                    |
| FTL_0118     | <i>iglI</i> | hypothetical protein                                                                        | 487.0                               | -2.74             | 2.5E-18          | 487.0                               | -3.01             | 3.1E-21          | yes                    |
| FTL_0125     | <i>pdpB</i> | PdpB protein                                                                                | 466.2                               | -2.70             | 3.1E-18          | 466.2                               | -3.46             | 8.8E-28          | yes                    |
| FTL_0815     | -           | PRC-barrel protein                                                                          | 73.4                                | -2.59             | 4.6E-20          | 73.4                                | -3.26             | 7.5E-24          | no                     |
| FTL_0067     | -           | -                                                                                           | 37.5                                | -2.57             | 9.3E-14          | 37.5                                | -3.21             | 1.1E-16          | yes                    |
| FTL_0879     | -           | beta-lactamase                                                                              | 1198.1                              | -2.55             | 9.9E-46          | 1198.1                              | -2.38             | 1.5E-39          | yes                    |
| FTL_0117     | <i>iglJ</i> | hypothetical protein                                                                        | 105.9                               | -2.41             | 3.3E-12          | 105.9                               | -2.61             | 3.3E-13          | yes                    |
| FTL_0124     | <i>iglE</i> | hypothetical protein                                                                        | 41.5                                | -2.41             | 4.9E-13          | 41.5                                | -3.38             | 1.0E-18          | yes                    |
| FTL_1217     | -           | hypothetical protein                                                                        | 70.0                                | -2.33             | 1.6E-11          | 70.0                                | -2.11             | 3.4E-09          | no                     |
| FTL_1832     | <i>fsIA</i> | hypothetical protein                                                                        | 2659.1                              | -2.29             | 1.3E-104         | 2659.1                              | -1.59             | 8.0E-52          | yes                    |
| FTL_0123     | <i>vgrG</i> | hypothetical protein                                                                        | 93.7                                | -2.25             | 2.3E-11          | 93.7                                | -2.87             | 8.3E-16          | yes                    |
| FTL_1218     | -           | hypothetical protein                                                                        | 597.6                               | -2.22             | 4.8E-07          | 597.6                               | -2.16             | 2.6E-06          | yes                    |
| FTL_1202     | -           | hypothetical protein                                                                        | 777.0                               | -2.18             | 7.9E-07          | 777.0                               | -2.62             | 5.1E-09          | yes                    |
| FTL_0941     | -           | hypothetical protein                                                                        | 1316.2                              | -2.17             | 6.2E-28          | 1316.2                              | -1.17             | 1.4E-08          | no                     |
| FTL_0119     | <i>dotU</i> | hypothetical protein                                                                        | 298.2                               | -2.14             | 9.1E-07          | 298.2                               | -2.56             | 1.0E-08          | yes                    |
| FTL_0673     | <i>panC</i> | pantoate-beta-alanine ligase                                                                | 15958.0                             | -2.13             | 4.7E-29          | 15958.0                             | -1.44             | 2.0E-13          | yes                    |
| FTL_0116     | <i>pdpC</i> | PdpC protein                                                                                | 1605.0                              | -2.12             | 1.4E-08          | 1605.0                              | -2.43             | 1.6E-10          | yes                    |
| FTL_0097     | -           | hypothetical protein                                                                        | 810.4                               | -2.12             | 2.2E-25          | 810.4                               | -3.02             | 6.1E-47          | yes                    |
| FTL_1833     | <i>fsiB</i> | hypothetical protein                                                                        | 485.0                               | -2.12             | 8.4E-44          | 485.0                               | -1.82             | 1.8E-32          | no                     |
| FTL_0209     | -           | DNA polymerase III subunit chi                                                              | 351.8                               | -2.11             | 3.5E-25          | 351.8                               | -2.18             | 1.3E-25          | yes                    |
| FTL_0674     | <i>panB</i> | 3-methyl-2-oxobutanoate hydroxymethyltransferase                                            | 21424.2                             | -2.10             | 3.0E-28          | 21424.2                             | -1.37             | 3.7E-12          | yes                    |
| FTL_0627     | <i>mtB</i>  | threonine efflux protein                                                                    | 268.4                               | -2.10             | 1.1E-16          | 268.4                               | -1.02             | 1.4E-04          | no                     |
| FTL_0675     | <i>panG</i> | hypothetical protein, putative ketopantoate reductase                                       | 4509.7                              | -2.09             | 3.5E-32          | 4509.7                              | -1.33             | 3.0E-13          | yes                    |
| FTL_0282     | -           | hypothetical protein                                                                        | 157.0                               | -2.09             | 3.1E-23          | 157.0                               | -1.94             | 3.3E-19          | no                     |
| FTL_0672     | <i>panD</i> | aspartate alpha-decarboxylase                                                               | 4620.1                              | -2.07             | 1.4E-26          | 4620.1                              | -1.38             | 4.4E-12          | yes                    |
| FTL_1834     | <i>fsiC</i> | diaminopimelate decarboxylase                                                               | 722.8                               | -2.06             | 3.4E-45          | 722.8                               | -1.58             | 3.6E-27          | yes                    |
| FTL_0543     | -           | -                                                                                           | 768.0                               | -2.05             | 5.2E-28          | 768.0                               | -3.13             | 6.0E-58          | yes                    |
| FTL_0491     | -           | outer membrane lipoprotein                                                                  | 1064.0                              | -2.01             | 1.1E-17          | 1064.0                              | -2.11             | 5.9E-19          | yes                    |
| FTL_0499     | -           | S-adenosylmethionine decarboxylase                                                          | 1641.0                              | -2.00             | 3.7E-28          | 1641.0                              | -1.16             | 6.2E-10          | yes                    |
| FTL_0500     | -           | spermidine synthase                                                                         | 1282.1                              | -2.00             | 2.6E-20          | 1282.1                              | -1.06             | 4.1E-06          | yes                    |
| FTL_0066     | -           | -                                                                                           | 33.5                                | -1.97             | 2.9E-08          | 33.5                                | -2.90             | 7.6E-13          | yes                    |
| FTL_1546     | -           | pyridoxal biosynthesis lyase Pdx5                                                           | 2923.9                              | -1.94             | 8.5E-36          | 2923.9                              | -2.74             | 3.8E-68          | yes                    |
| FTL_1091     | -           | -                                                                                           | 47.9                                | -1.89             | 1.9E-12          | 47.9                                | -1.61             | 8.5E-09          | no                     |
| FTL_0280     | -           | amino acid permease                                                                         | 366.8                               | -1.89             | 5.5E-27          | 366.8                               | -1.79             | 1.5E-23          | no                     |
| FTL_0859     | -           | rubredoxin                                                                                  | 246.7                               | -1.88             | 5.1E-30          | 246.7                               | 0.06              | 8.2E-01          | yes                    |
| FTL_1057     | -           | -                                                                                           | 184.5                               | -1.87             | 1.2E-16          | 184.5                               | -1.68             | 3.7E-13          | yes                    |
| FTL_1251     | <i>dptA</i> | proton-dependent oligopeptide transport (POT) family protein                                | 3093.6                              | -1.85             | 9.0E-69          | 3093.6                              | -1.02             | 1.6E-21          | yes                    |
| FTL_0569     | -           | hypothetical protein                                                                        | 6072.5                              | -1.82             | 6.8E-26          | 6072.5                              | -2.65             | 3.2E-53          | yes                    |
| FTL_0550     | -           | -                                                                                           | 102.7                               | -1.78             | 7.5E-14          | 102.7                               | -2.54             | 1.2E-21          | yes                    |
| FTL_0942     | -           | nicotinamide mononucleotide transport (NMT) family protein                                  | 1144.3                              | -1.78             | 5.8E-13          | 1144.3                              | -1.19             | 4.7E-06          | yes                    |
| FTL_1876     | -           | outer membrane associated protein, fragment                                                 | 613.5                               | -1.76             | 2.0E-23          | 613.5                               | -1.57             | 2.7E-18          | yes                    |
| FTL_1225     | -           | hypothetical protein                                                                        | 1834.3                              | -1.76             | 1.3E-29          | 1834.3                              | -1.62             | 4.8E-25          | yes                    |
| FTL_0924     | -           | proton-dependent oligopeptide transporter                                                   | 37.2                                | -1.76             | 1.6E-05          | 37.2                                | -1.96             | 6.5E-06          | yes                    |
| FTL_0767     | -           | hypothetical protein                                                                        | 566.9                               | -1.75             | 6.0E-20          | 566.9                               | -1.83             | 6.8E-21          | yes                    |
| FTL_1790     | <i>ampG</i> | major facilitator superfamily transporter                                                   | 5492.3                              | -1.72             | 7.1E-44          | 5492.3                              | -1.29             | 6.0E-25          | yes                    |
| FTL_1097     | <i>fipA</i> | Macrophage infectivity potentiator, fragment, FipA                                          | 3157.7                              | -1.71             | 1.4E-38          | 3157.7                              | -0.07             | 7.3E-01          | no                     |
| FTL_0671     | -           | pantothenate kinase                                                                         | 12136.8                             | -1.70             | 5.1E-21          | 12136.8                             | -1.25             | 1.9E-11          | yes                    |
| FTL_1545     | -           | glutamine amidotransferase subunit PdxT                                                     | 1428.2                              | -1.68             | 8.0E-28          | 1428.2                              | -2.77             | 1.2E-68          | yes                    |
| FTL_1509     | -           | D-alanyl-D-alanine carboxypeptidase/D-alanyl-D-alanine-endopeptidase                        | 285.3                               | -1.67             | 8.9E-26          | 285.3                               | -1.78             | 2.7E-27          | yes                    |
| FTL_1096     | <i>dsbA</i> | Disulfide bond formation protein A / FipB                                                   | 9535.1                              | -1.66             | 1.8E-23          | 9535.1                              | -0.13             | 5.9E-01          | no                     |
| FTL_0473     | -           | peptide deformylase                                                                         | 706.3                               | -1.66             | 4.4E-14          | 706.3                               | -2.12             | 1.7E-21          | yes                    |
| FTL_0807     | -           | major facilitator transporter                                                               | 604.4                               | -1.65             | 4.9E-27          | 604.4                               | -1.33             | 1.1E-17          | no                     |
| FTL_0753     | -           | aminoacylase                                                                                | 174.1                               | -1.64             | 5.2E-13          | 174.1                               | -1.59             | 1.4E-11          | yes                    |
| FTL_1317     | -           | hypothetical protein                                                                        | 1813.3                              | -1.60             | 6.1E-25          | 1813.3                              | -1.11             | 3.9E-12          | no                     |
| FTL_1214     | -           | hypothetical protein                                                                        | 23.1                                | -1.60             | 1.8E-05          | 23.1                                | -2.67             | 4.0E-10          | yes                    |
| FTL_1354     | -           | EamA family transporter                                                                     | 905.6                               | -1.59             | 8.1E-19          | 905.6                               | -0.99             | 1.6E-07          | no                     |
| FTL_0122     | <i>iglF</i> | hypothetical protein                                                                        | 81.8                                | -1.59             | 4.9E-06          | 81.8                                | -2.21             | 1.4E-09          | yes                    |
| FTL_1892     | -           | hypothetical protein                                                                        | 1841.5                              | -1.58             | 1.5E-23          | 1841.5                              | -1.16             | 8.7E-13          | no                     |
| FTL_1835     | <i>fsiD</i> | hypothetical protein                                                                        | 461.0                               | -1.55             | 6.3E-30          | 461.0                               | -1.96             | 6.5E-43          | yes                    |
| FTL_0265     | -           | hypothetical protein                                                                        | 1790.3                              | -1.54             | 8.4E-22          | 1790.3                              | -1.12             | 1.6E-11          | no                     |
| FTL_0881     | -           | hypothetical protein                                                                        | 5.0                                 | -1.54             | 2.5E-03          | 5.0                                 | -1.50             | 6.7E-03          | yes                    |
| FTL_0808     | -           | bifunctional 4'-phosphopantothencysteine decarboxylase, phosphopantothencysteine synthetase | 1334.3                              | -1.53             | 1.7E-16          | 1334.3                              | -0.89             | 6.5E-06          | yes                    |
| FTL_0457     | -           | cold shock protein                                                                          | 1412.7                              | -1.52             | 2.8E-24          | 1412.7                              | -0.20             | 3.1E-01          | no                     |
| FTL_0814     | -           | hypothetical protein                                                                        | 127.0                               | -1.49             | 7.6E-14          | 127.0                               | -1.95             | 4.4E-19          | no                     |
| FTL_0570     | -           | hypothetical protein                                                                        | 198.6                               | -1.48             | 1.1E-09          | 198.6                               | -2.16             | 2.2E-17          | yes                    |
| FTL_0963     | -           | proton-dependent oligopeptide transport (POT) family protein                                | 591.9                               | -1.48             | 2.4E-28          | 591.9                               | -1.09             | 1.3E-15          | no                     |
| FTL_0130     | -           | isopropylmalate/homocitrate/citramalate synthase family protein                             | 646.1                               | -1.44             | 4.7E-34          | 646.1                               | -1.30             | 3.8E-27          | yes                    |
| FTL_0425     | -           | Type IV pilI glycosylation protein                                                          | 1391.5                              | -1.43             | 1.0E-23          | 1391.5                              | -1.20             | 1.6E-16          | yes                    |
| FTL_0953     | -           | hypothetical protein                                                                        | 512.9                               | -1.43             | 1.3E-03          | 512.9                               | -2.05             | 7.8E-06          | no                     |
| FTL_0131     | -           | branched-chain amino acid aminotransferase                                                  | 2131.1                              | -1.41             | 6.5E-38          | 2131.1                              | -1.38             | 7.6E-36          | yes                    |
| FTL_1174     | -           | cystathionine beta-synthase (cystein synthase)                                              | 1399.7                              | -1.41             | 8.5E-14          | 1399.7                              | -0.80             | 7.6E-05          | yes                    |
| FTL_1135     | -           | -                                                                                           | 207.5                               | -1.37             | 2.2E-05          | 207.5                               | -1.09             | 1.9E-03          | yes                    |
| FTL_0456     | <i>rpsU</i> | 30S ribosomal protein S21                                                                   | 4080.0                              | -1.37             | 2.2E-13          | 4080.0                              | 0.18              | 4.8E-01          | no                     |
| FTL_0448     | -           | hypothetical protein                                                                        | 412.7                               | -1.37             | 9.6E-16          | 412.7                               | -0.35             | 7.3E-02          | yes                    |
| FTL_1146     | <i>gapA</i> | glyceraldehyde-3-phosphate dehydrogenase                                                    | 8411.6                              | -1.37             | 9.2E-15          | 8411.6                              | -0.75             | 7.4E-05          | yes                    |
| FTL_1454     | -           | -                                                                                           | 44.1                                | -1.35             | 3.3E-06          | 44.1                                | -0.19             | 6.3E-01          | no                     |
| FTL_1345     | -           | -                                                                                           | 927.0                               | -1.35             | 6.3E-21          | 927.0                               | -0.77             | 3.3E-07          | no                     |
| FTL_0477     | <i>gcvT</i> | glycine cleavage system aminomethyltransferase T                                            | 5119.7                              | -1.35             | 5.1E-20          | 5119.7                              | -0.23             | 2.3E-01          | yes                    |
| FTL_R0002    | -           | -                                                                                           | 1001.5                              | -1.34             | 4.0E-09          | 1001.5                              | 0.20              | 5.4E-01          | no                     |
| FTL_1556     | -           | hypothetical protein                                                                        | 229.4                               | -1.34             | 2.0E-09          | 229.4                               | -0.30             | 2.9E-01          | yes                    |
| FTL_1485     | -           | hypothetical protein                                                                        | 507.9                               | -1.34             | 4.9E-14          | 507.9                               | -0.11             | 6.7E-01          | yes                    |
| FTL_1224     | -           | thioredoxin                                                                                 | 1287.7                              | -1.32             | 1.4E-15          | 1287.7                              | -0.99             | 8.2E-09          | yes                    |
| FTL_0765     | -           | VacJ lipoprotein                                                                            | 573.1                               | -1.30             | 6.2E-11          | 573.1                               | -0.62             | 1.5E-15          | no                     |
| FTL_0307     | <i>coaE</i> | dephospho-CoA kinase                                                                        | 3558.5                              | -1.28             | 2.5E-65          | 3558.5                              | 0.36              | 5.0E-06          | yes                    |
| FTL_1511     | -           | glycerophosphoryl diester phosphodiesterase family protein                                  | 5147.3                              | -1.28             | 1.1E-26          | 5147.3                              | -0.31             | 2.3E-02          | yes                    |
| FTL_0759     | -           | hypothetical protein                                                                        | 43.0                                | -1.28             | 5.0E-05          | 43.0                                | -1.27             | 2.0E-04          | no                     |
| FTL_0190     | -           | major facilitator transporter                                                               | 426.8                               | -1.28             | 4.3E-26          | 426.8                               | -0.04             | 8.1E-01          | no                     |
| FTL_0748     | -           | major facilitator transporter                                                               | 639.1                               | -1.25             | 1.0E-30          | 639.1                               | -0.05             | 7.6E-01          | no                     |



|           |              |                                                                    |         |       |         |         |       |         |     |
|-----------|--------------|--------------------------------------------------------------------|---------|-------|---------|---------|-------|---------|-----|
| FTL 0572  | -            | hypothetical protein                                               | 10162.3 | -1.25 | 6.9E-16 | 10162.3 | -0.27 | 1.6E-01 | yes |
| FTL 0809  | -            | -                                                                  | 1340.6  | -1.24 | 4.7E-13 | 1340.6  | -0.91 | 3.5E-07 | yes |
| FTL 1012  | -            | hypothetical protein                                               | 611.5   | -1.23 | 1.3E-23 | 611.5   | -0.47 | 3.8E-04 | no  |
| FTL 0361  | -            | LemA-like protein                                                  | 2923.7  | -1.22 | 1.8E-15 | 2923.7  | -0.59 | 4.0E-04 | no  |
| FTL 1046  | <i>dacB</i>  | D-alanyl-D-alanine carboxypeptidase                                | 2518.0  | -1.19 | 2.7E-31 | 2518.0  | -0.17 | 1.8E-01 | no  |
| FTL 0385  | -            | -                                                                  | 781.7   | -1.19 | 1.2E-11 | 781.7   | -1.10 | 1.3E-09 | yes |
| FTL 1739  | -            | S-adenosylmethionine synthetase                                    | 1558.4  | -1.19 | 2.4E-09 | 1558.4  | -0.76 | 4.3E-04 | no  |
| FTL 0858  | -            | hypothetical protein                                               | 480.5   | -1.18 | 5.3E-11 | 480.5   | -0.25 | 2.7E-01 | no  |
| FTL 0147  | -            | hypothetical protein                                               | 327.0   | -1.18 | 1.5E-06 | 327.0   | -1.85 | 2.1E-13 | yes |
| FTL 0129  | -            | 2-isopropylmalate synthase                                         | 1233.4  | -1.18 | 2.5E-13 | 1233.4  | -1.15 | 3.0E-12 | yes |
| FTL 0786  | -            | N-acetylglucosamine-6-phosphate deacetylase                        | 1565.2  | -1.17 | 4.0E-14 | 1565.2  | -0.05 | 8.5E-01 | yes |
| FTL 0384  | -            | -                                                                  | 1146.2  | -1.17 | 1.9E-11 | 1146.2  | -0.71 | 1.4E-04 | yes |
| FTL 1727  | <i>ampD</i>  | N-acetyl-anhydromuramyl-L-alanine amidase                          | 589.1   | -1.16 | 1.2E-27 | 589.1   | -0.55 | 5.8E-07 | no  |
| FTL 1936  | -            | periplasmic solute binding family protein                          | 5552.8  | -1.15 | 5.8E-17 | 5552.8  | -0.09 | 6.7E-01 | no  |
| FTL 0691  | -            | proton-dependent oligopeptide transport (POT) family protein       | 6993.0  | -1.15 | 6.7E-72 | 6993.0  | -0.79 | 2.2E-34 | no  |
| FTL 1147  | <i>pgk</i>   | phosphoglycerate kinase                                            | 6974.7  | -1.15 | 7.0E-11 | 6974.7  | -0.67 | 5.0E-04 | yes |
| FTL 0663  | -            | hypothetical protein                                               | 29.2    | -1.15 | 1.8E-02 | 29.2    | -1.03 | 6.0E-02 | yes |
| FTL 1458  | <i>secA</i>  | preprotein translocase subunit SecA                                | 7842.9  | -1.15 | 2.4E-19 | 7842.9  | 0.13  | 4.7E-01 | no  |
| FTL 0094  | <i>cipB</i>  | CipB protein                                                       | 8887.1  | -1.15 | 2.0E-09 | 8887.1  | -0.97 | 1.0E-06 | no  |
| FTL 0937  | -            | hypothetical protein                                               | 428.5   | -1.14 | 2.8E-14 | 428.5   | -0.70 | 1.0E-05 | no  |
| FTL 0901  | -            | monooxygenase family protein                                       | 345.7   | -1.13 | 2.7E-13 | 345.7   | -0.19 | 3.4E-01 | no  |
| FTL 1212  | <i>leuS</i>  | leucyl-tRNA synthetase                                             | 6620.4  | -1.12 | 1.2E-22 | 6620.4  | 0.12  | 4.3E-01 | no  |
| FTL 0099  | -            | tryptophan synthase subunit beta                                   | 2085.6  | -1.11 | 2.0E-09 | 2085.6  | -0.63 | 1.8E-03 | yes |
| FTL 1075  | -            | hypothetical protein                                               | 2017.7  | -1.11 | 5.8E-27 | 2017.7  | 0.30  | 8.2E-03 | no  |
| FTL 1148  | <i>pyk</i>   | pyruvate kinase                                                    | 7457.6  | -1.11 | 2.6E-08 | 7457.6  | -0.49 | 3.2E-02 | no  |
| FTL 1013  | -            | hypothetical protein                                               | 770.7   | -1.10 | 5.4E-04 | 770.7   | -0.62 | 9.3E-02 | no  |
| FTL 0847  | <i>yajC</i>  | preprotein translocase family protein                              | 2706.4  | -1.10 | 2.6E-27 | 2706.4  | -0.43 | 7.7E-05 | no  |
| FTL 0073  | -            | hypothetical protein                                               | 4022.1  | -1.10 | 8.1E-18 | 4022.1  | -0.44 | 2.0E-03 | no  |
| FTL 0478  | -            | glycine cleavage system H protein                                  | 3192.5  | -1.10 | 6.9E-14 | 3192.5  | -0.33 | 5.1E-02 | no  |
| FTL 0573  | -            | hypothetical protein                                               | 3994.4  | -1.09 | 2.7E-30 | 3994.4  | -0.43 | 3.1E-05 | no  |
| FTL 0222  | -            | hypothetical protein                                               | 1670.0  | -1.08 | 2.5E-14 | 1670.0  | -0.09 | 6.7E-01 | yes |
| FTL 1360  | <i>rpsU</i>  | 30S ribosomal protein S21                                          | 632.0   | -1.08 | 2.0E-11 | 632.0   | -0.04 | 8.9E-01 | no  |
| FTL 0098  | <i>trpA</i>  | tryptophan synthase subunit alpha                                  | 1172.9  | -1.07 | 4.7E-08 | 1172.9  | -0.66 | 2.2E-03 | no  |
| FTL 1344  | -            | hypothetical protein                                               | 94.9    | -1.06 | 3.2E-06 | 94.9    | 0.38  | 1.4E-01 | no  |
| FTL 1094  | -            | -                                                                  | 217.1   | -1.06 | 2.2E-04 | 217.1   | -1.45 | 1.3E-06 | no  |
| FTL 0902  | -            | oxidoreductase                                                     | 143.0   | -1.06 | 1.4E-07 | 143.0   | -0.31 | 2.0E-01 | no  |
| FTL 1223  | -            | hypothetical protein                                               | 584.5   | -1.05 | 4.5E-07 | 584.5   | -0.87 | 8.2E-05 | no  |
| FTL 0681  | <i>potG</i>  | ATP-binding cassette putrescine uptake system, ATP-binding protein | 6004.2  | -1.05 | 1.3E-17 | 6004.2  | 0.15  | 3.7E-01 | no  |
| FTL 1678  | -            | hypothetical protein                                               | 2661.2  | -1.05 | 1.3E-04 | 2661.2  | -1.66 | 2.0E-09 | yes |
| FTL 1312  | -            | S-transferase                                                      | 447.5   | -1.04 | 1.2E-09 | 447.5   | -0.92 | 3.0E-07 | no  |
| FTL 1494  | -            | hypothetical protein                                               | 2056.9  | -1.04 | 8.9E-23 | 2056.9  | 0.04  | 8.0E-01 | no  |
| FTL 1045  | -            | lipoprotein                                                        | 914.6   | -1.04 | 1.5E-12 | 914.6   | -0.34 | 4.3E-02 | no  |
| FTL 1269  | -            | -                                                                  | 14.7    | -1.04 | 1.3E-02 | 14.7    | -2.44 | 1.5E-07 | no  |
| FTL 0360  | -            | heat shock protein HtpX                                            | 2944.2  | -1.03 | 1.6E-13 | 2944.2  | -0.63 | 2.1E-05 | no  |
| FTL 1081  | -            | hypothetical protein                                               | 7.4     | -1.03 | 4.2E-02 | 7.4     | -1.44 | 8.3E-03 | no  |
| FTL 1015  | -            | AhpC/TSA family protein                                            | 6835.9  | -1.02 | 7.0E-22 | 6835.9  | -0.65 | 5.7E-09 | no  |
| FTL 1095  | -            | -                                                                  | 95.4    | -1.02 | 5.8E-04 | 95.4    | -1.34 | 2.6E-05 | no  |
| FTL 0834  | -            | rhodanese-like family protein                                      | 1931.1  | -1.02 | 3.5E-35 | 1931.1  | -0.30 | 9.1E-04 | yes |
| FTL 1227  | -            | -                                                                  | 1334.1  | -1.02 | 1.6E-14 | 1334.1  | -1.00 | 9.6E-14 | yes |
| FTL 0571  | -            | hypothetical protein                                               | 2277.5  | -1.01 | 5.0E-42 | 2277.5  | -0.21 | 1.6E-02 | no  |
| FTL 1901  | -            | hypothetical protein                                               | 138.7   | -1.01 | 4.6E-06 | 138.7   | -1.45 | 6.5E-10 | yes |
| FTL R0044 | <i>ffs</i>   | 4.5 S RNA                                                          | 2885.6  | -1.01 | 9.2E-05 | 2885.6  | -0.33 | 3.2E-01 | no  |
| FTL 0466  | -            | soluble lytic murein transglycosylase                              | 1555.4  | -1.01 | 1.5E-21 | 1555.4  | 0.04  | 7.9E-01 | no  |
| FTL 0295  | -            | acetyl-CoA carboxylase carboxyltransferase subunit alpha           | 9506.9  | -1.01 | 3.0E-17 | 9506.9  | 0.25  | 8.3E-02 | yes |
| FTL 1568  | -            | LysR family transcriptional regulator                              | 97.4    | -1.01 | 8.7E-05 | 97.4    | -0.95 | 6.0E-04 | no  |
| FTL 1145  | -            | transketolase                                                      | 6600.6  | -1.00 | 2.9E-14 | 6600.6  | -0.03 | 8.8E-01 | no  |
| FTL 1056  | -            | -                                                                  | 33.7    | -0.95 | 9.6E-04 | 33.7    | -1.49 | 8.0E-06 | yes |
| FTL 1092  | -            | -                                                                  | 33.4    | -0.95 | 1.3E-03 | 33.4    | -1.31 | 7.6E-05 | yes |
| FTL 0379  | -            | methionine sulfoxide reductase B                                   | 360.0   | -0.90 | 1.4E-11 | 360.0   | -1.42 | 3.6E-24 | yes |
| FTL 1508  | -            | -                                                                  | 13.2    | -0.89 | 4.1E-02 | 13.2    | -1.43 | 3.1E-03 | yes |
| FTL 0115  | <i>pdpE</i>  | hypothetical protein                                               | 109.1   | -0.87 | 8.8E-03 | 109.1   | -2.19 | 2.3E-10 | yes |
| FTL 0925  | -            | proton-dependent oligopeptide transport (POT) family protein       | 33.1    | -0.86 | 4.0E-02 | 33.1    | -1.09 | 1.7E-02 | yes |
| FTL 0880  | -            | hypothetical protein                                               | 135.1   | -0.85 | 2.6E-04 | 135.1   | -1.42 | 1.1E-08 | yes |
| FTL 1640  | -            | amino acid transporter protein, fragment                           | 1004.5  | -0.78 | 2.3E-15 | 1004.5  | -1.25 | 1.6E-35 | yes |
| FTL 1503  | <i>dgt</i>   | deoxyguanosinetriphosphate triphosphohydrolase                     | 1223.7  | -0.76 | 7.6E-07 | 1223.7  | -0.05 | 1.6E-11 | yes |
| FTL 1242  | -            | ThiI/PfpI family protein                                           | 487.2   | -0.74 | 2.9E-08 | 487.2   | -1.11 | 5.3E-16 | yes |
| FTL 0155  | -            | -                                                                  | 172.7   | -0.73 | 6.0E-03 | 172.7   | -1.40 | 5.5E-07 | yes |
| FTL 1196  | -            | hypothetical protein                                               | 36.2    | -0.73 | 2.9E-02 | 36.2    | -1.45 | 9.4E-05 | yes |
| FTL 0952  | -            | hypothetical protein                                               | 14.9    | -0.69 | 1.0E-01 | 14.9    | -1.13 | 1.6E-02 | no  |
| FTL 0061  | -            | hypothetical protein                                               | 50.6    | -0.67 | 7.4E-02 | 50.6    | -1.46 | 2.2E-04 | no  |
| FTL 0161  | -            | -                                                                  | 449.0   | -0.58 | 1.3E-02 | 449.0   | -1.05 | 1.6E-05 | yes |
| FTL 1226  | -            | -                                                                  | 291.8   | -0.54 | 4.4E-03 | 291.8   | -1.15 | 6.1E-09 | yes |
| FTL 0160  | -            | LamB/YcsF family protein                                           | 437.6   | -0.22 | 4.5E-01 | 437.6   | -1.02 | 2.7E-04 | no  |
| FTL 1921  | -            | ABC transporter ATP-binding protein                                | 182.6   | 0.00  | 9.9E-01 | 182.6   | -1.34 | 4.6E-11 | no  |
| FTL 0812  | -            | -                                                                  | 35.8    | 0.12  | 7.2E-01 | 35.8    | -1.11 | 7.7E-04 | no  |
| FTL 1068  | <i>truA</i>  | tRNA pseudouridine synthase A                                      | 297.4   | 0.12  | 4.0E-01 | 297.4   | -1.13 | 8.8E-16 | no  |
| FTL 0159  | -            | hydrolase subunit                                                  | 322.2   | 0.36  | 1.9E-01 | 322.2   | -1.45 | 8.1E-08 | no  |
| FTL 0158  | <i>acpA</i>  | acid phosphatase, phospholipase C                                  | 2420.9  | 1.00  | 6.8E-14 | 2420.9  | -0.33 | 3.6E-02 | no  |
| FTL 1322  | -            | -                                                                  | 20.3    | 1.00  | 3.6E-03 | 20.3    | -0.30 | 5.8E-01 | no  |
| FTL 1465  | -            | hypothetical protein                                               | 109.6   | 1.00  | 9.6E-08 | 109.6   | 0.13  | 6.7E-01 | no  |
| FTL 0018  | <i>isfU1</i> | transposase                                                        | 590.1   | 1.01  | 4.9E-06 | 590.1   | 0.24  | 4.2E-01 | yes |
| FTL 1600  | -            | periplasmic L-asparaginase II                                      | 170.3   | 1.01  | 4.6E-06 | 170.3   | -0.53 | 5.2E-02 | yes |
| FTL 1032  | -            | ribosomal-protein-alanine acetyltransferase                        | 4.7     | 1.01  | 5.0E-02 | 4.7     | 0.30  | 6.9E-01 | no  |
| FTL 0563  | -            | -                                                                  | 8.7     | 1.02  | 3.1E-02 | 8.7     | -0.82 | 1.7E-01 | no  |
| FTL 0006  | -            | indolepyruvate decarboxylase                                       | 152.9   | 1.03  | 1.0E-06 | 152.9   | -0.06 | 8.6E-01 | no  |
| FTL 0272  | -            | diaminopimelate decarboxylase                                      | 73.9    | 1.03  | 1.2E-04 | 73.9    | 0.00  | 1.0E+00 | no  |
| FTL 1008  | -            | -                                                                  | 53.3    | 1.03  | 3.1E-06 | 53.3    | 0.36  | 2.3E-01 | yes |
| FTL 0184  | -            | hypothetical protein                                               | 117.0   | 1.03  | 6.3E-07 | 117.0   | -0.05 | 8.8E-01 | no  |
| FTL 0781  | -            | -                                                                  | 80.8    | 1.03  | 9.2E-07 | 80.8    | -0.32 | 2.8E-01 | no  |
| FTL 1698  | -            | hypothetical protein                                               | 17.9    | 1.03  | 4.7E-03 | 17.9    | 0.00  | 1.0E+00 | no  |
| FTL 1651  | -            | -                                                                  | 15.1    | 1.04  | 4.2E-03 | 15.1    | -0.21 | 7.3E-01 | yes |
| FTL 1953  | -            | -                                                                  | 7.0     | 1.04  | 2.7E-02 | 7.0     | -0.50 | 4.4E-01 | no  |
| FTL 1559  | -            | -                                                                  | 102.7   | 1.05  | 6.5E-09 | 102.7   | -0.17 | 5.5E-01 | no  |
| FTL 1730  | -            | hypothetical protein                                               | 6.1     | 1.05  | 3.1E-02 | 6.1     | 0.19  | 8.1E-01 | no  |
| FTL 0003  | -            | hypothetical protein                                               | 6.2     | 1.05  | 3.3E-02 | 6.2     | -0.43 | 5.4E-01 | no  |
| FTL 1504  | <i>kotG</i>  | peroxidase/catalase                                                | 56629.7 | 1.06  | 8.3E-06 | 56629.7 | 0.48  | 8.5E-02 | yes |
| FTL 0103  | -            | hypothetical protein                                               | 1456.1  | 1.06  | 3.2E-09 | 1456.1  | 0.20  | 3.9E-01 | no  |
| FTL 1495  | -            | cysteine/glutathione ABC transporter membrane/ATP-binding protein  | 1022.8  | 1.06  | 9.1E-13 | 1022.8  | 0.22  | 2.6E-01 | no  |
| FTL 1281  | -            | hypothetical protein                                               | 86.3    | 1.06  | 2.1E-05 | 86.3    | 0.08  | 8.6E-01 | no  |
| FTL 1922  | -            | YggT family protein                                                | 481.7   | 1.07  | 9.3E-11 | 481.7   | -0.31 | 1.4E-01 | no  |
| FTL 1870  | -            | -                                                                  | 23.4    | 1.07  | 1.7E-03 | 23.4    | -0.04 | 9.5E-01 | no  |
| FTL 0134  | -            | hypothetical protein                                               | 14.7    | 1.07  | 5.1E-03 | 14.7    | -0.34 | 5.6E-01 | no  |
| FTL 1715  | <i>groES</i> | co-chaperonin GroES                                                | 5073.4  | 1.07  | 1.2E-05 | 5073.4  | -0.18 | 6.0E-01 | no  |
| FTL 1555  | -            | hypothetical protein                                               | 164.5   | 1.08  | 1.3E-10 | 164.5   | 0.21  | 3.8E-01 | no  |
| FTL 1011  | -            | -                                                                  | 2.7     | 1.09  | 4.5E-02 | 2.7     | -0.09 | 9.1E-01 | yes |
| FTL 0621  | -            | -                                                                  | 552.5   | 1.09  | 1.8E-15 | 552.5   | 0.55  | 3.1E-04 | no  |
| FTL 0719  | -            | hypothetical protein                                               | 169.6   | 1.09  | 1.2E-05 | 169.6   | -0.03 | 9.4E-01 | no  |
| FTL 0976  | -            | hypothetical protein                                               | 278.3   | 1.11  | 1.9E-09 | 278.3   | 0.03  | 9.3E-01 | no  |
| FTL 1776  | -            | hypothetical protein                                               | 281.7   | 1.12  | 4.6E-05 | 281.7   | -0.70 | 2.9E-02 | yes |
| FTL 0544  | <i>ppk</i>   | polyphosphate kinase 2                                             | 1045.7  | 1.12  | 2.4E-09 | 1045.7  | 0.63  | 2.2E-03 | yes |
| FTL 0172  | <i>murC</i>  | UDP-N-acetylmuramate-L-alanine ligase                              | 965.8   | 1.12  | 1.3E-21 | 965.8   | -0.05 | 7.9E-01 | no  |

|          |              |                                                             |        |      |         |        |       |         |     |
|----------|--------------|-------------------------------------------------------------|--------|------|---------|--------|-------|---------|-----|
| FTL 1260 | -            | -                                                           | 7.1    | 1.13 | 1.3E-02 | 7.1    | 0.46  | 4.6E-01 | no  |
| FTL 0484 | <i>pgm</i>   | phosphoglucosylase                                          | 2590.5 | 1.14 | 1.6E-17 | 2590.5 | 0.62  | 1.6E-05 | no  |
| FTL 0773 | -            | -                                                           | 2.6    | 1.14 | 3.3E-02 | 2.6    | 0.21  | 7.9E-01 | no  |
| FTL 1010 | -            | -                                                           | 20.7   | 1.14 | 2.7E-03 | 20.7   | -0.09 | 9.0E-01 | yes |
| FTL 1502 | -            | major facilitator transporter                               | 32.3   | 1.15 | 1.7E-03 | 32.3   | -0.50 | 3.2E-01 | no  |
| FTL 1156 | -            | hypothetical protein                                        | 9.0    | 1.16 | 2.3E-02 | 9.0    | -0.70 | 2.8E-01 | no  |
| FTL 0162 | -            | hypothetical protein                                        | 51.8   | 1.16 | 9.4E-05 | 51.8   | -0.44 | 2.8E-01 | no  |
| FTL 1770 | -            | Type IV pili nucleotide-binding protein                     | 95.9   | 1.16 | 1.6E-05 | 95.9   | 0.10  | 8.3E-01 | no  |
| FTL 0957 | <i>blaA</i>  | Beta-lactamase class A                                      | 213.1  | 1.17 | 5.0E-10 | 213.1  | 0.30  | 2.2E-01 | no  |
| FTL 0038 | <i>emrA2</i> | HlyD family secretion protein                               | 1629.7 | 1.17 | 2.2E-05 | 1629.7 | -0.14 | 7.5E-01 | no  |
| FTL 0485 | <i>glgC</i>  | glucose-1-phosphate adenyltransferase                       | 3934.1 | 1.17 | 3.2E-11 | 3934.1 | 0.75  | 7.4E-05 | yes |
| FTL 1289 | -            | hypothetical protein                                        | 3.1    | 1.19 | 2.8E-02 | 3.1    | -0.17 | 8.3E-01 | no  |
| FTL 1367 | -            | hypothetical protein                                        | 91.9   | 1.19 | 7.0E-05 | 91.9   | -0.41 | 3.1E-01 | no  |
| FTL 0056 | -            | NADH dehydrogenase                                          | 590.3  | 1.19 | 1.8E-11 | 590.3  | -0.43 | 4.5E-02 | yes |
| FTL 0710 | -            | chologlycine hydrolase family protein                       | 17.4   | 1.19 | 6.7E-04 | 17.4   | -0.17 | 7.8E-01 | no  |
| FTL 1632 | -            | hypothetical protein                                        | 25.9   | 1.20 | 2.8E-04 | 25.9   | -0.06 | 9.1E-01 | no  |
| FTL 0163 | -            | MFS transporter                                             | 11.7   | 1.21 | 6.6E-03 | 11.7   | -0.56 | 3.7E-01 | no  |
| FTL 1877 | -            | -                                                           | 56.3   | 1.21 | 1.6E-06 | 56.3   | -0.48 | 1.8E-01 | no  |
| FTL 1292 | -            | hypothetical protein                                        | 9.0    | 1.21 | 9.9E-03 | 9.0    | 0.34  | 6.2E-01 | no  |
| FTL 1758 | -            | hypothetical protein                                        | 53.3   | 1.22 | 5.7E-07 | 53.3   | -0.07 | 8.8E-01 | no  |
| FTL 0347 | -            | hypothetical protein                                        | 148.7  | 1.22 | 5.5E-16 | 148.7  | 0.10  | 6.9E-01 | no  |
| FTL 1948 | -            | major facilitator transporter                               | 247.0  | 1.22 | 4.2E-10 | 247.0  | -0.16 | 5.8E-01 | yes |
| FTL 0970 | -            | L-lactate dehydrogenase                                     | 89.6   | 1.22 | 6.0E-09 | 89.6   | -0.03 | 9.4E-01 | no  |
| FTL 0751 | -            | lipoprotein                                                 | 375.7  | 1.22 | 1.9E-26 | 375.7  | -0.06 | 7.6E-01 | no  |
| FTL 0486 | <i>glgA</i>  | glycogen synthase                                           | 3201.6 | 1.22 | 5.5E-17 | 3201.6 | 0.64  | 4.7E-05 | yes |
| FTL 1691 | -            | hypothetical protein                                        | 55.2   | 1.22 | 1.2E-07 | 55.2   | 0.10  | 8.0E-01 | yes |
| FTL 1778 | -            | -                                                           | 160.5  | 1.23 | 4.2E-07 | 160.5  | -0.18 | 6.2E-01 | no  |
| FTL 0860 | -            | hypothetical protein                                        | 114.7  | 1.23 | 4.5E-10 | 114.7  | -0.33 | 2.3E-01 | yes |
| FTL 0450 | <i>psd</i>   | phosphatidylserine decarboxylase                            | 1364.7 | 1.23 | 2.6E-10 | 1364.7 | -0.04 | 8.9E-01 | yes |
| FTL 1950 | -            | hypothetical protein                                        | 216.2  | 1.24 | 3.4E-14 | 216.2  | 0.40  | 4.3E-02 | no  |
| FTL 1347 | -            | hypothetical protein                                        | 58.4   | 1.26 | 4.9E-06 | 58.4   | -0.33 | 4.2E-01 | no  |
| FTL 0971 | -            | FAD linked oxidase                                          | 169.7  | 1.26 | 1.4E-11 | 169.7  | -0.12 | 6.8E-01 | no  |
| FTL 1927 | -            | -                                                           | 45.9   | 1.27 | 1.5E-06 | 45.9   | -0.52 | 1.7E-01 | no  |
| FTL 0791 | -            | hypothetical protein                                        | 12.6   | 1.28 | 9.7E-04 | 12.6   | 0.03  | 9.7E-01 | no  |
| FTL 0365 | -            | -                                                           | 120.1  | 1.28 | 1.5E-10 | 120.1  | 0.17  | 5.8E-01 | yes |
| FTL 1916 | -            | competence-like protein                                     | 109.1  | 1.29 | 1.2E-12 | 109.1  | 0.13  | 6.6E-01 | no  |
| FTL 0051 | -            | hypothetical protein                                        | 69.2   | 1.29 | 4.9E-07 | 69.2   | 0.13  | 7.5E-01 | no  |
| FTL 0044 | -            | transglutaminase                                            | 284.2  | 1.29 | 1.9E-17 | 284.2  | 0.46  | 9.0E-03 | no  |
| FTL 1054 | -            | putative alpha-xylosidase                                   | 146.1  | 1.30 | 5.6E-09 | 146.1  | 0.00  | 1.0E+00 | yes |
| FTL 1945 | -            | hypothetical protein                                        | 115.9  | 1.30 | 5.4E-12 | 115.9  | -0.55 | 2.6E-02 | no  |
| FTL 1777 | -            | -                                                           | 95.1   | 1.31 | 1.6E-07 | 95.1   | -0.44 | 1.9E-01 | no  |
| FTL 1368 | -            | hypothetical protein                                        | 32.9   | 1.31 | 5.1E-04 | 32.9   | -0.90 | 6.1E-02 | no  |
| FTL 1175 | -            | -                                                           | 18.2   | 1.32 | 6.2E-04 | 18.2   | 0.05  | 9.4E-01 | no  |
| FTL 0944 | -            | -                                                           | 14.9   | 1.33 | 8.9E-04 | 14.9   | -0.46 | 4.3E-01 | no  |
| FTL 1326 | -            | hypothetical protein                                        | 54.1   | 1.33 | 7.1E-07 | 54.1   | 0.46  | 1.9E-01 | no  |
| FTL 0344 | -            | hypothetical protein                                        | 23.1   | 1.33 | 1.3E-04 | 23.1   | 0.24  | 6.6E-01 | no  |
| FTL 0869 | -            | hypothetical protein                                        | 2.0    | 1.33 | 1.3E-02 | 2.0    | 0.32  | 6.7E-01 | no  |
| FTL 0735 | -            | -                                                           | 10.7   | 1.33 | 1.9E-03 | 10.7   | 0.02  | 9.8E-01 | yes |
| FTL 0842 | -            | transposase                                                 | 10.9   | 1.34 | 1.2E-03 | 10.9   | 0.52  | 3.6E-01 | no  |
| FTL 1262 | -            | chorismate binding family protein                           | 858.7  | 1.35 | 3.6E-10 | 858.7  | 0.21  | 4.8E-01 | no  |
| FTL 1565 | -            | -                                                           | 53.1   | 1.35 | 1.2E-07 | 53.1   | -0.25 | 5.3E-01 | no  |
| FTL 0366 | -            | -                                                           | 28.5   | 1.35 | 2.7E-05 | 28.5   | -0.04 | 9.5E-01 | no  |
| FTL 1373 | -            | hypothetical protein                                        | 69.5   | 1.36 | 6.7E-08 | 69.5   | -0.52 | 1.4E-01 | no  |
| FTL 1261 | -            | anthranilate synthase component II                          | 271.9  | 1.36 | 1.7E-26 | 271.9  | 0.17  | 3.6E-01 | no  |
| FTL 1690 | -            | hypothetical protein                                        | 64.3   | 1.36 | 1.2E-07 | 64.3   | -0.45 | 2.2E-01 | yes |
| FTL 1677 | -            | -                                                           | 4.7    | 1.36 | 8.9E-03 | 4.7    | -0.07 | 9.3E-01 | no  |
| FTL 0934 | -            | hypothetical protein                                        | 13.6   | 1.37 | 1.1E-03 | 13.6   | 0.06  | 9.3E-01 | no  |
| FTL 1320 | -            | hypothetical protein                                        | 13.2   | 1.38 | 2.6E-04 | 13.2   | -0.35 | 5.7E-01 | no  |
| FTL 0171 | -            | tetrapyrrole methyltransferase family protein               | 370.1  | 1.40 | 1.3E-17 | 370.1  | 0.15  | 5.4E-01 | no  |
| FTL 0037 | -            | hypothetical protein                                        | 649.4  | 1.40 | 4.3E-11 | 649.4  | -0.05 | 9.0E-01 | no  |
| FTL 0641 | -            | hypothetical protein                                        | 11.5   | 1.41 | 8.4E-04 | 11.5   | 0.55  | 3.4E-01 | no  |
| FTL 0973 | -            | -                                                           | 147.2  | 1.42 | 4.0E-14 | 147.2  | -0.11 | 7.3E-01 | no  |
| FTL 0432 | -            | hypothetical protein                                        | 92.2   | 1.42 | 3.5E-11 | 92.2   | 0.19  | 5.6E-01 | no  |
| FTL 0972 | -            | -                                                           | 133.2  | 1.43 | 1.0E-12 | 133.2  | 0.22  | 4.6E-01 | no  |
| FTL 1752 | -            | helicase                                                    | 114.3  | 1.44 | 1.9E-19 | 114.3  | -0.24 | 3.3E-01 | no  |
| FTL 0826 | -            | -                                                           | 46.8   | 1.46 | 1.2E-08 | 46.8   | -0.06 | 8.9E-01 | no  |
| FTL 1682 | -            | hypothetical protein                                        | 7.0    | 1.48 | 1.8E-03 | 7.0    | 0.50  | 4.4E-01 | no  |
| FTL 1466 | -            | major facilitator transporter                               | 55.4   | 1.48 | 9.2E-09 | 55.4   | -0.15 | 7.3E-01 | no  |
| FTL 1857 | -            | -                                                           | 28.3   | 1.49 | 3.4E-04 | 28.3   | -0.17 | 8.0E-01 | no  |
| FTL 0997 | -            | hypothetical protein                                        | 16.5   | 1.50 | 1.4E-04 | 16.5   | -0.20 | 7.6E-01 | no  |
| FTL 0819 | -            | -                                                           | 12.4   | 1.50 | 5.3E-04 | 12.4   | -0.32 | 6.4E-01 | no  |
| FTL 0528 | -            | Type III restriction enzyme                                 | 601.1  | 1.50 | 9.9E-31 | 601.1  | 0.17  | 3.4E-01 | yes |
| FTL 1844 | -            | secretion protein                                           | 49.2   | 1.51 | 2.9E-10 | 49.2   | 0.40  | 2.3E-01 | no  |
| FTL 1378 | -            | -                                                           | 71.5   | 1.52 | 2.0E-08 | 71.5   | -0.07 | 8.9E-01 | yes |
| FTL 1321 | -            | hypothetical protein                                        | 12.0   | 1.54 | 3.3E-04 | 12.0   | -0.09 | 9.1E-01 | no  |
| FTL 1629 | -            | hypothetical protein                                        | 63.4   | 1.54 | 6.9E-09 | 63.4   | -0.62 | 8.3E-02 | no  |
| FTL 1564 | -            | -                                                           | 20.9   | 1.55 | 2.4E-05 | 20.9   | -0.36 | 5.3E-01 | no  |
| FTL 1053 | -            | putative alpha-xylosidase                                   | 40.1   | 1.56 | 9.8E-07 | 40.1   | 0.00  | 9.9E-01 | yes |
| FTL 0065 | -            | -                                                           | 40.6   | 1.59 | 2.7E-08 | 40.6   | -0.20 | 6.7E-01 | yes |
| FTL 0559 | -            | hypothetical protein                                        | 23.9   | 1.59 | 2.7E-07 | 23.9   | -0.36 | 4.6E-01 | no  |
| FTL 0558 | -            | oxidoreductase                                              | 39.4   | 1.63 | 8.4E-10 | 39.4   | -0.02 | 9.7E-01 | no  |
| FTL 0409 | -            | purine/pyrimidine phosphoribosyl transferase family protein | 124.9  | 1.64 | 6.9E-13 | 124.9  | 0.39  | 2.0E-01 | no  |
| FTL 1470 | -            | major facilitator transporter                               | 56.5   | 1.66 | 4.5E-13 | 56.5   | -0.10 | 8.2E-01 | no  |
| FTL 0636 | -            | NADH oxidase                                                | 82.2   | 1.66 | 3.5E-12 | 82.2   | 0.46  | 1.3E-01 | no  |
| FTL 0415 | -            | hypothetical protein                                        | 43.0   | 1.68 | 4.5E-11 | 43.0   | -0.21 | 6.3E-01 | no  |
| FTL 0576 | -            | hypothetical protein                                        | 23.3   | 1.68 | 2.5E-07 | 23.3   | 0.11  | 8.6E-01 | yes |
| FTL 0055 | -            | hypothetical protein                                        | 45.1   | 1.69 | 7.1E-09 | 45.1   | 0.04  | 9.4E-01 | no  |
| FTL 1562 | -            | -                                                           | 220.8  | 1.72 | 5.3E-18 | 220.8  | 0.41  | 1.0E-01 | no  |
| FTL 1769 | -            | -                                                           | 11.2   | 1.74 | 1.5E-05 | 11.2   | 0.49  | 3.9E-01 | no  |
| FTL 0050 | -            | hypothetical protein                                        | 13.8   | 1.75 | 1.0E-05 | 13.8   | 0.54  | 3.2E-01 | no  |
| FTL 0889 | -            | hypothetical protein                                        | 26.7   | 1.76 | 5.6E-08 | 26.7   | 0.31  | 5.2E-01 | no  |
| FTL 1314 | -            | hypothetical protein                                        | 37.6   | 1.76 | 4.3E-08 | 37.6   | 0.44  | 3.2E-01 | no  |
| FTL 1379 | -            | -                                                           | 159.4  | 1.78 | 3.4E-24 | 159.4  | -0.62 | 7.8E-03 | yes |
| FTL 1563 | -            | -                                                           | 99.3   | 1.80 | 2.4E-13 | 99.3   | 0.56  | 6.7E-02 | no  |
| FTL 1814 | -            | -                                                           | 69.6   | 1.80 | 1.7E-09 | 69.6   | 0.08  | 8.8E-01 | no  |
| FTL 0577 | -            | hypothetical protein                                        | 12.1   | 1.81 | 3.8E-05 | 12.1   | 0.31  | 6.6E-01 | yes |
| FTL 0998 | -            | hypothetical protein                                        | 8.9    | 1.82 | 4.3E-05 | 8.9    | 0.53  | 4.0E-01 | no  |
| FTL 0734 | -            | -                                                           | 60.4   | 1.90 | 3.0E-16 | 60.4   | -0.19 | 6.4E-01 | yes |
| FTL 0527 | -            | endonuclease                                                | 34.9   | 1.91 | 2.7E-11 | 34.9   | 0.15  | 7.7E-01 | no  |
| FTL 1377 | -            | hypothetical protein                                        | 45.3   | 1.93 | 3.2E-12 | 45.3   | 0.13  | 8.0E-01 | no  |
| FTL 1052 | -            | putative glycosidase                                        | 5.5    | 1.94 | 6.9E-05 | 5.5    | 0.24  | 7.6E-01 | yes |
| FTL 1675 | -            | -                                                           | 15.5   | 1.94 | 2.1E-07 | 15.5   | -0.11 | 8.8E-01 | no  |
| FTL 1380 | -            | -                                                           | 25.0   | 1.97 | 1.8E-10 | 25.0   | -0.05 | 9.3E-01 | no  |
| FTL 1853 | -            | lipoprotein                                                 | 30.4   | 2.05 | 3.2E-13 | 30.4   | 0.12  | 8.1E-01 | no  |
| FTL 1628 | -            | hypothetical protein                                        | 55.9   | 2.06 | 4.5E-11 | 55.9   | -0.10 | 8.6E-01 | no  |
| FTL 0352 | -            | hypothetical protein                                        | 11.6   | 2.06 | 9.2E-07 | 11.6   | 0.19  | 8.0E-01 | no  |
| FTL 0529 | -            | uracil-DNA glycosylase                                      | 168.9  | 2.17 | 3.0E-34 | 168.9  | 0.20  | 4.6E-01 | yes |
| FTL 1103 | -            | -                                                           | 34.3   | 2.22 | 7.5E-14 | 34.3   | 0.39  | 3.8E-01 | yes |
| FTL 0340 | -            | hypothetical protein                                        | 11.0   | 2.29 | 1.6E-07 | 11.0   | 0.14  | 8.6E-01 | no  |

\*Previous MglA regulon based on Brotcck et al., 2006 and Charity et al., 2007

**Table S3: Data collection and refinement statistics**

|                                                     | <i>Ft</i> (MgIA-SspA)-<br>ppGpp-PigR complex  |
|-----------------------------------------------------|-----------------------------------------------|
| <b>Data collection</b>                              |                                               |
| PDB code                                            | 6WEG                                          |
| Space group                                         | P2 <sub>1</sub> 2 <sub>1</sub> 2 <sub>1</sub> |
| Cell dimensions                                     |                                               |
| <i>a</i> , <i>b</i> , <i>c</i> (Å)                  | 65.75, 113.56, 141.07                         |
| $\alpha$ , $\beta$ , $\gamma$ (°)                   | 90.0, 90.0, 90.0                              |
| Resolution (Å)                                      | 88.46 (2.95)*                                 |
| <i>R</i> <sub>sym</sub>                             | 0.091 (1.380)                                 |
| <i>R</i> <sub>pim</sub>                             | 0.063 (0.950)                                 |
| <i>I</i> / $\sigma$ <i>I</i>                        | 7.3 (1.2)                                     |
| Completeness (%)                                    | 98.1 (99.2)                                   |
| Redundancy                                          | 2.9 (2.9)                                     |
| CC(1/2)                                             | 0.997 (0.338)                                 |
| <b>Refinement</b>                                   |                                               |
| Resolution (Å)                                      | 88.46-2.95                                    |
| No. reflections                                     | 22055                                         |
| <i>R</i> <sub>work</sub> / <i>R</i> <sub>free</sub> | 22.5/28.6                                     |
| No. atoms                                           |                                               |
| Protein                                             | 6535                                          |
| ppGpp/Mg <sup>2+</sup>                              | 74                                            |
| Water                                               | 0                                             |
| Ramachandran analyses                               |                                               |
| Favored (%)                                         | 89.1                                          |
| Disallowed (%)                                      | 0.0                                           |
| R.m.s. deviations                                   |                                               |
| Bond lengths (Å)                                    | 0.004                                         |
| Bond angles (°)                                     | 0.805                                         |

\*Values in parentheses are for highest-resolution shell.
